# Supplementary material for: Exploration of Novel Genetic Loci Influencing Mercury Accumulation in Maize through a Genome-wide Association Study Utilizing an Enlarged SNP Panel
Source: Preprints.org preprint supplement (doi:10.20944/preprints202401.0870.v1), 2024-01-11
Supplement: Supplementary file 1 [file supplementary]

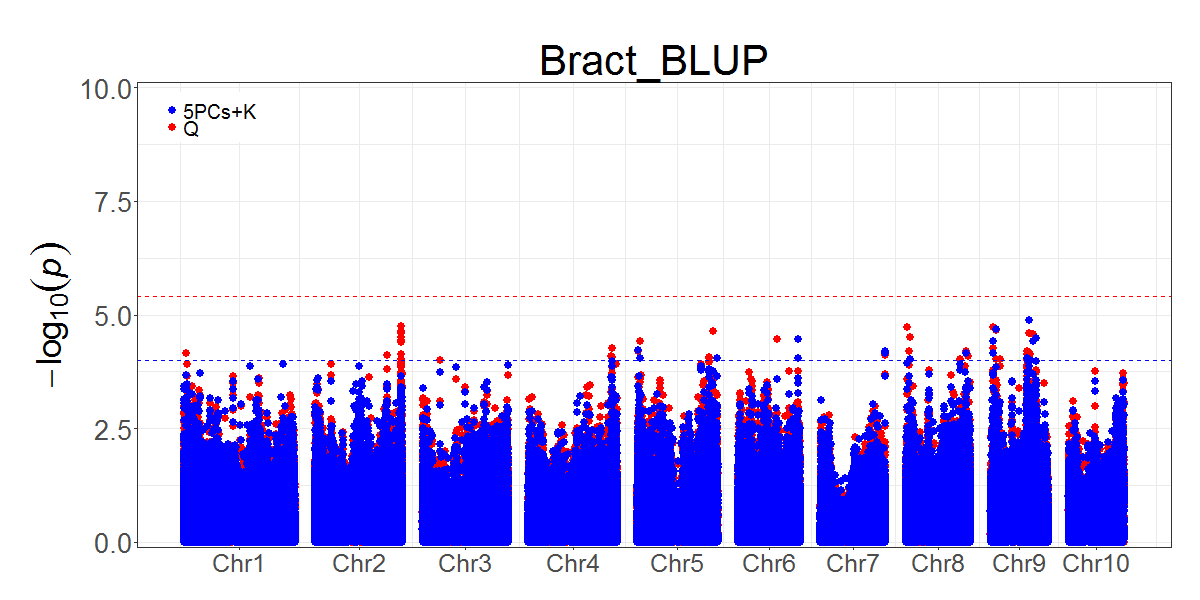

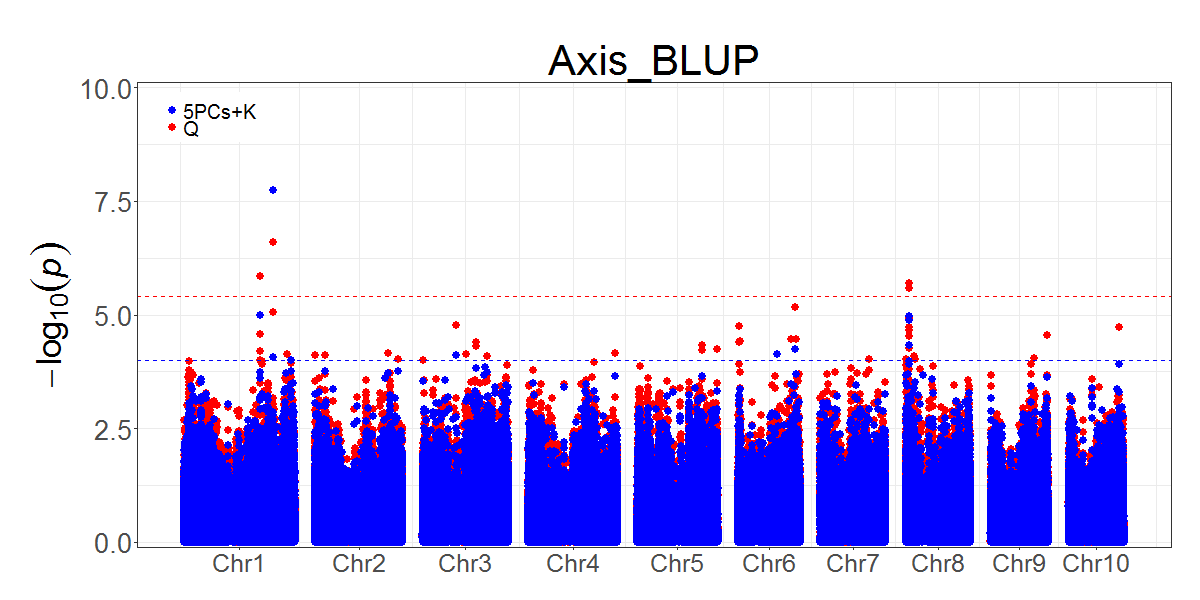


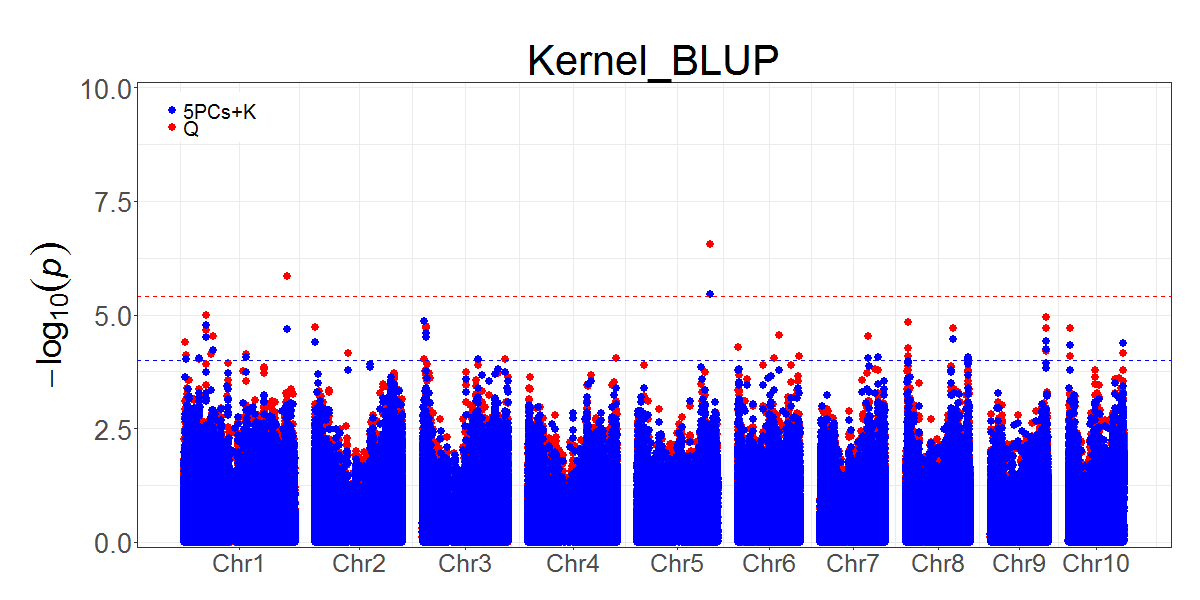

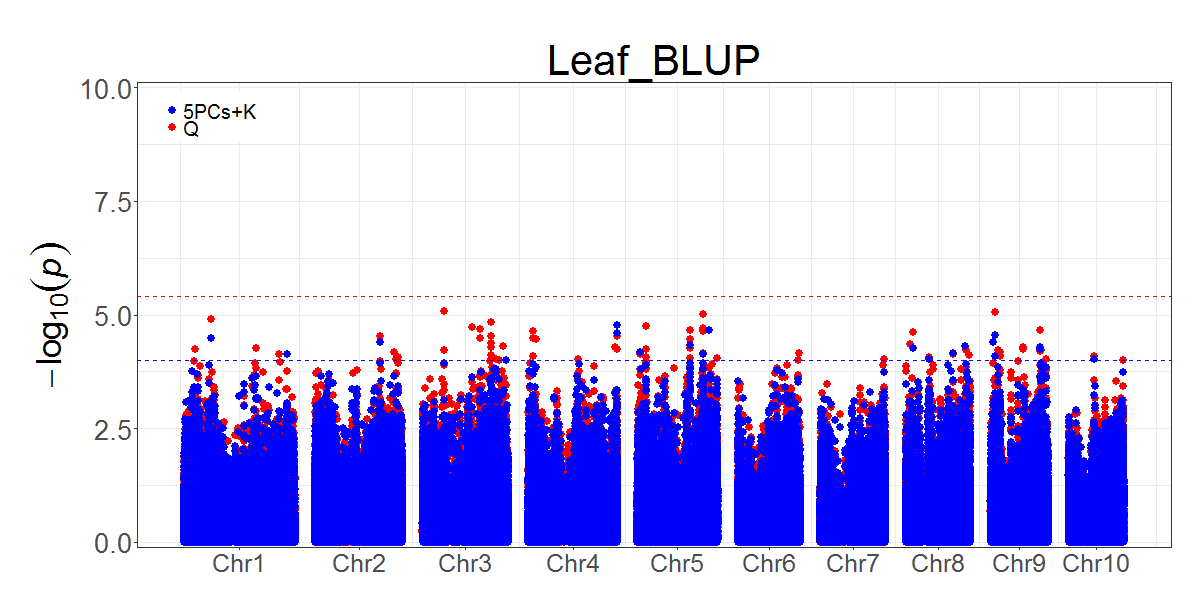


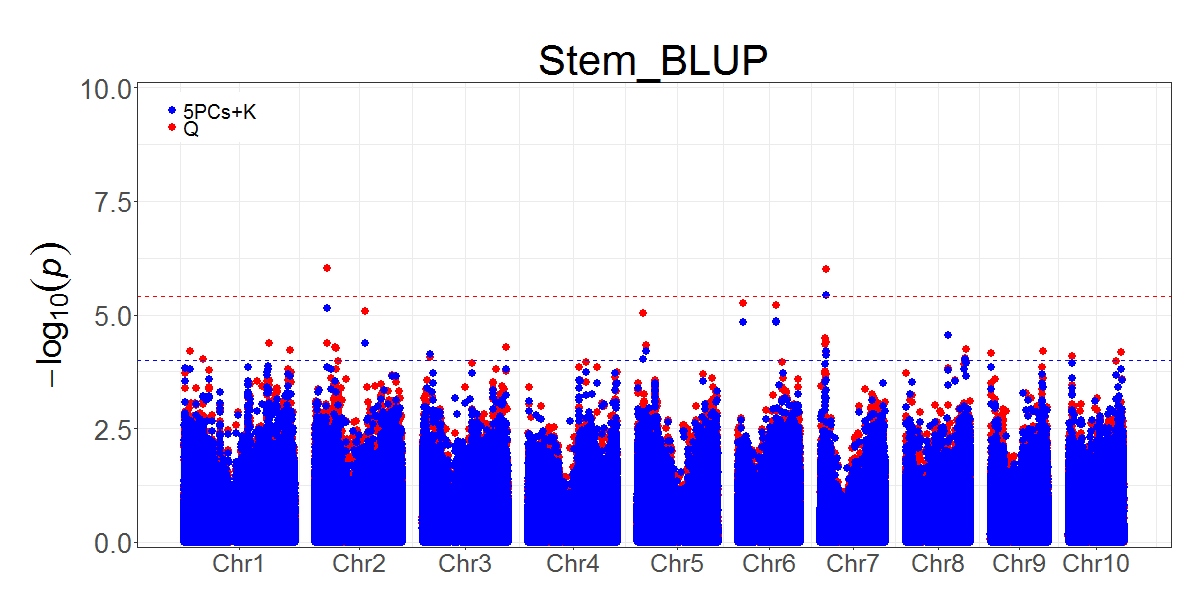


**Figure S1**. Comparison of Manhattan plots resulting from GWAS, based on 0.55M SNPs, using Q model and 5PCs+K model for mercury content in maize axis, stem, bract, leaf and kernel at BLUP environments.


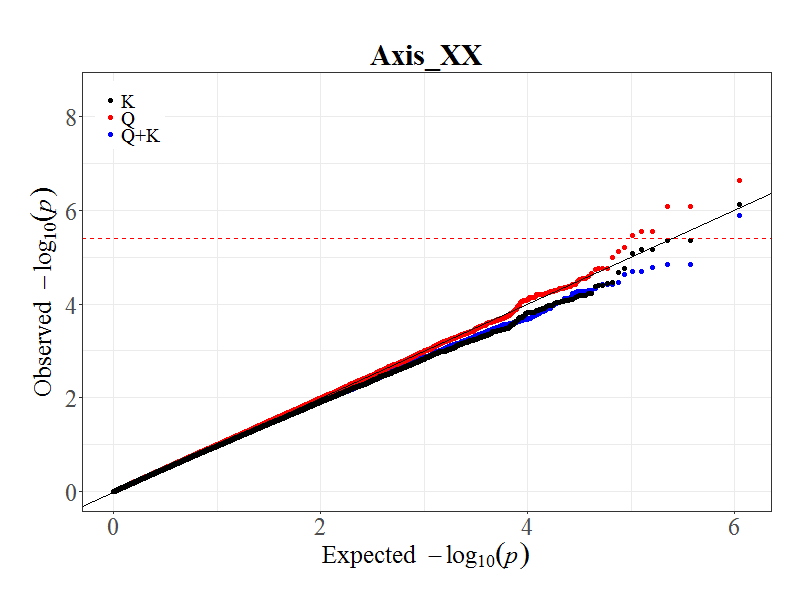

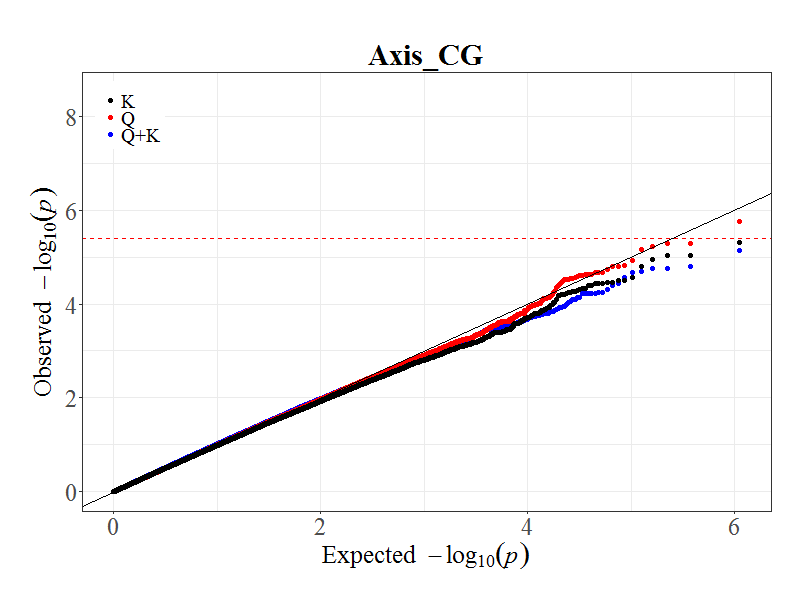


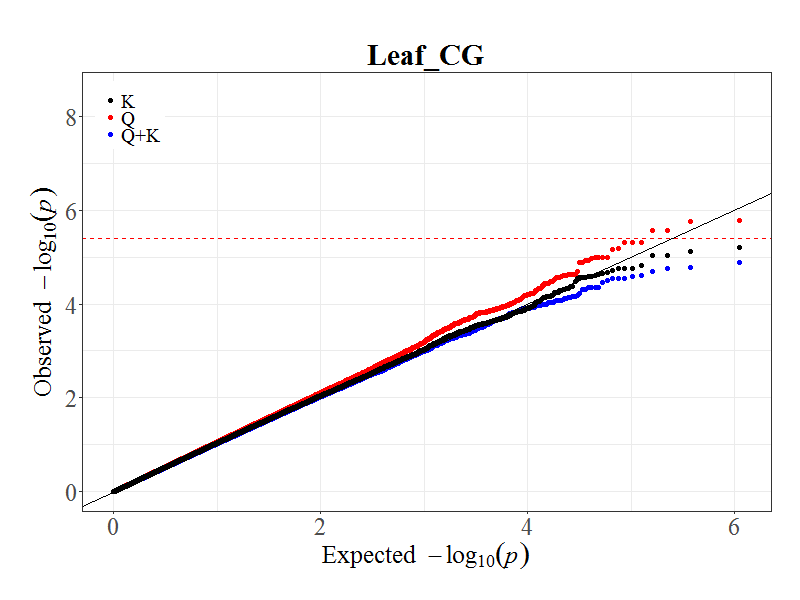

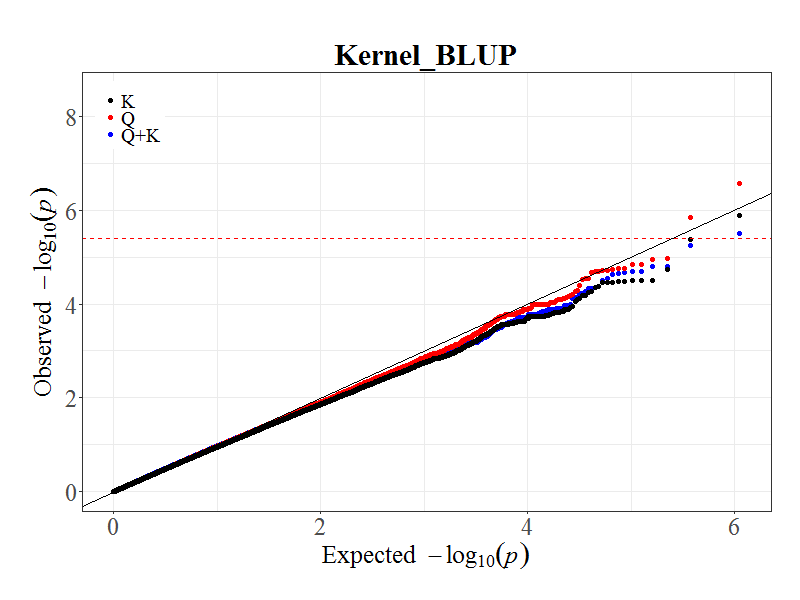

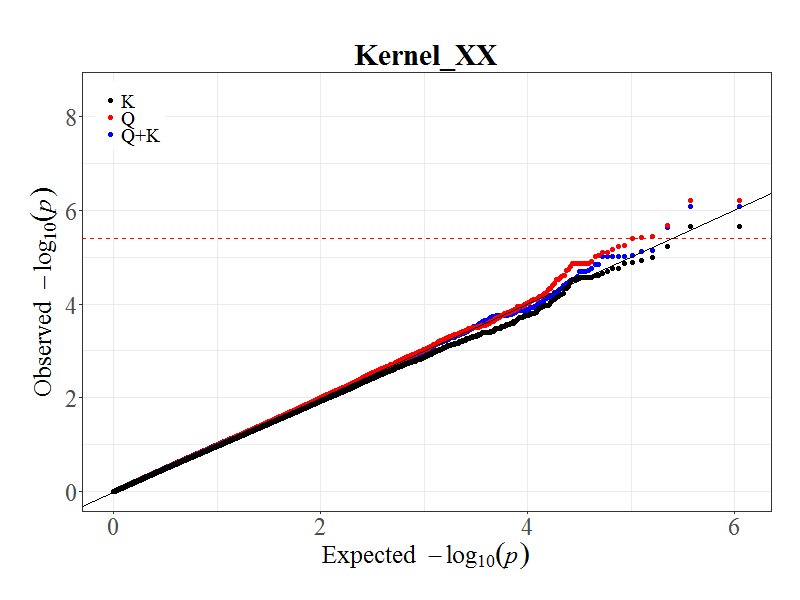

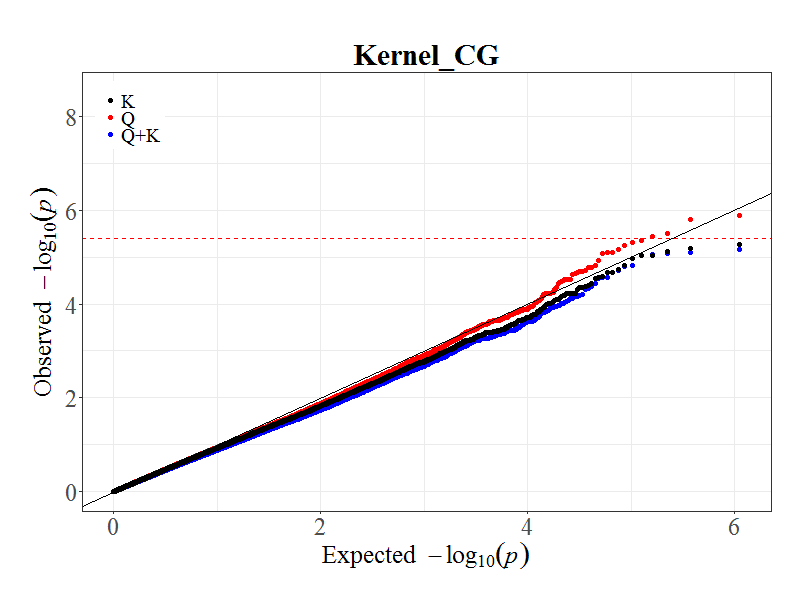

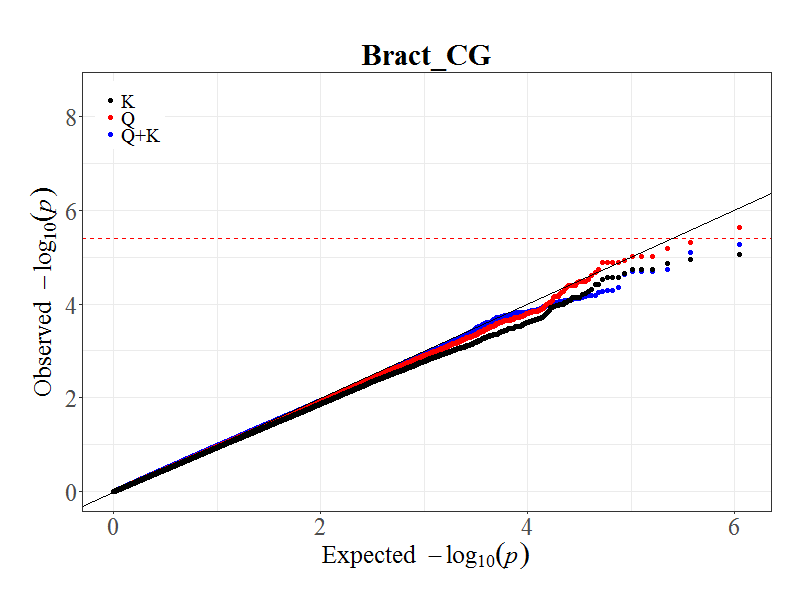

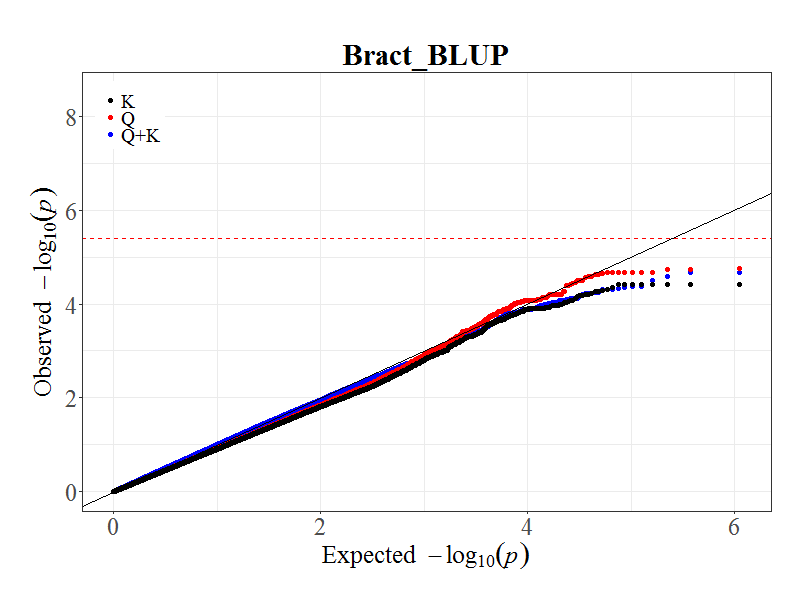

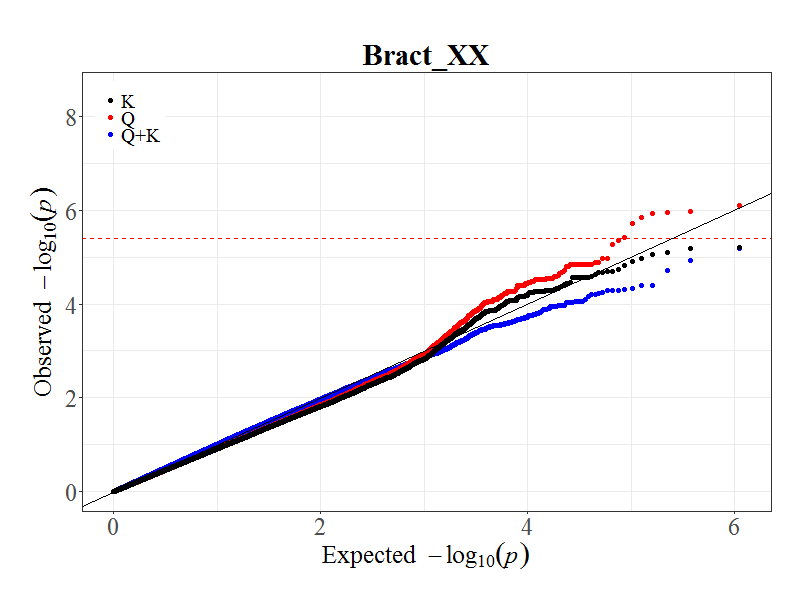

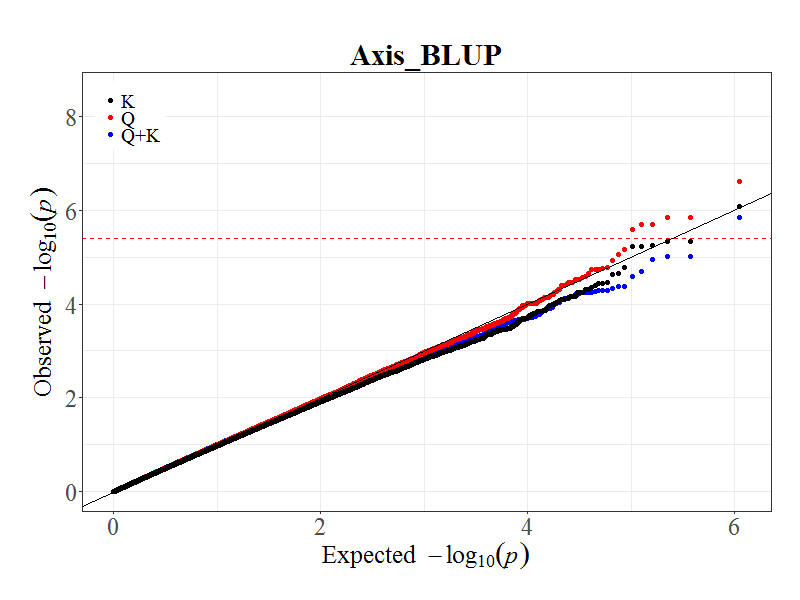

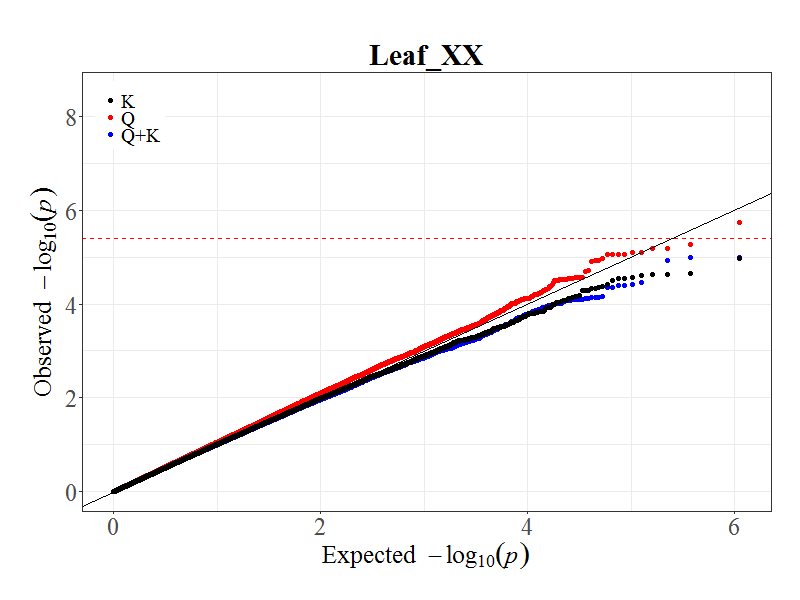

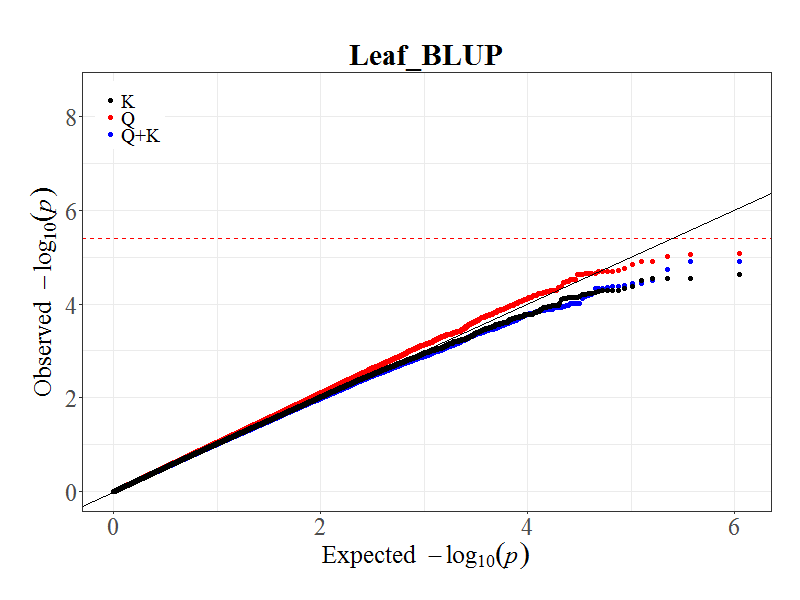


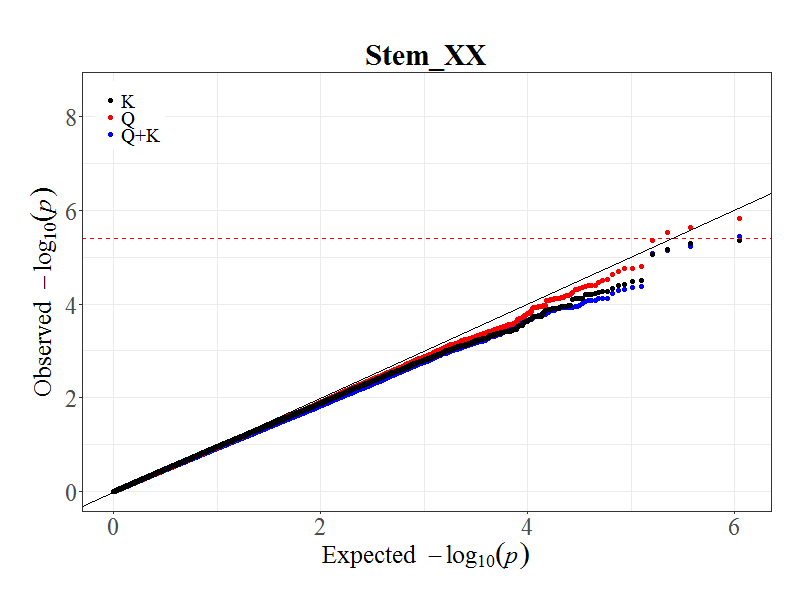

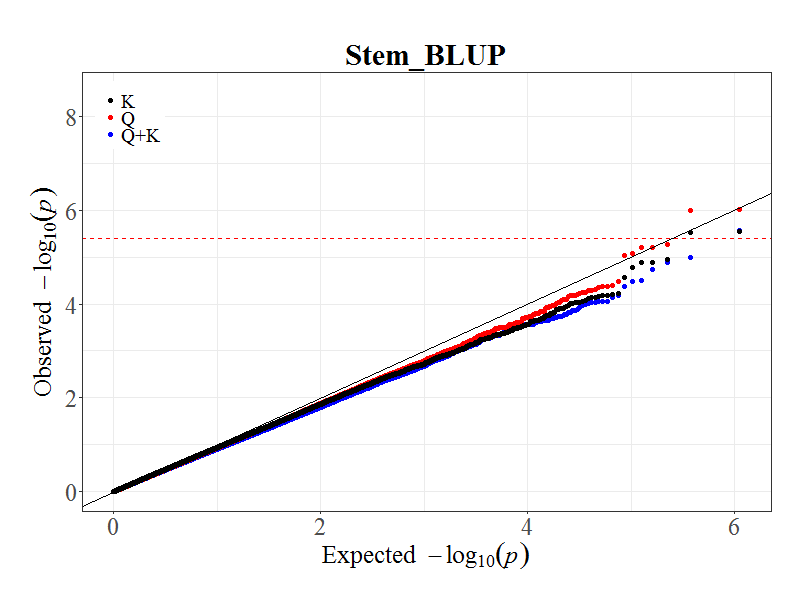

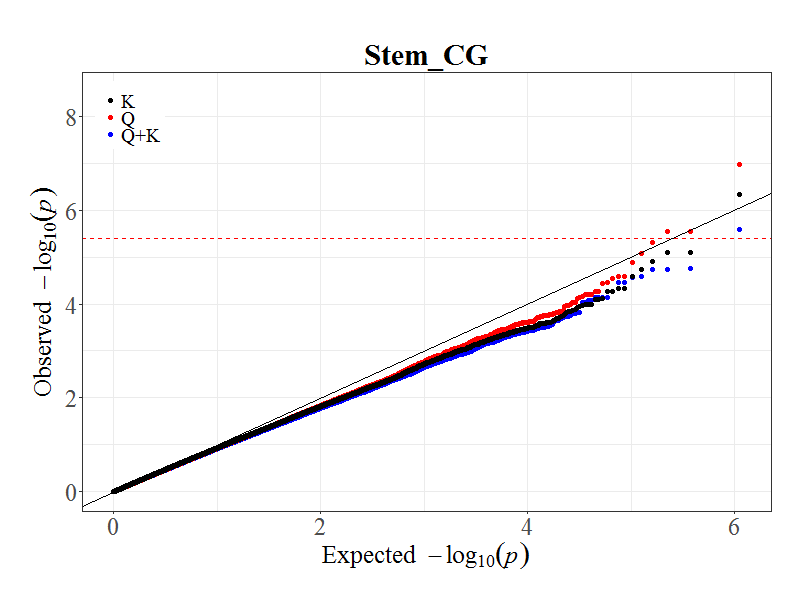


**Figure S2.** Comparison of Quantile-quantile (QQ) plots resulting from GWAS, based on 0.55M SNPs, using three models (Q, K and Q+K) for mercury content in maize axis, stem, bract, leaf, and kernel at three environments.


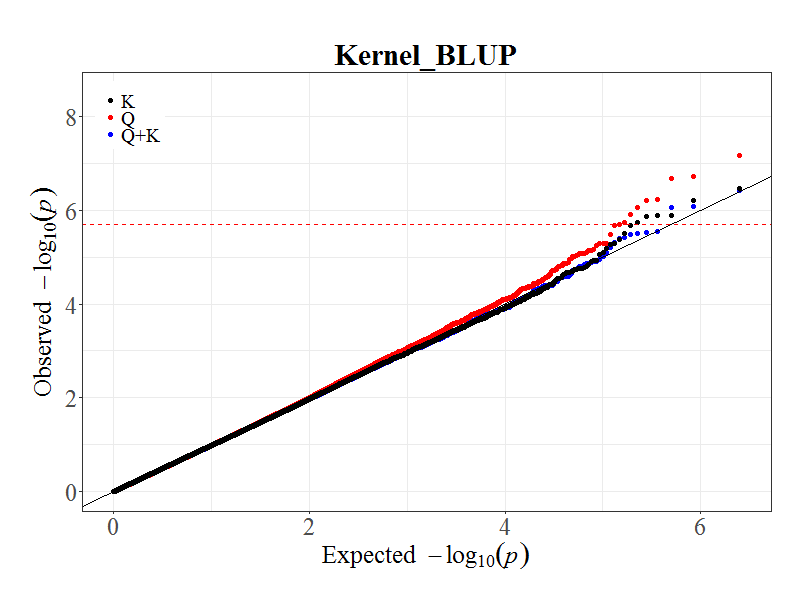

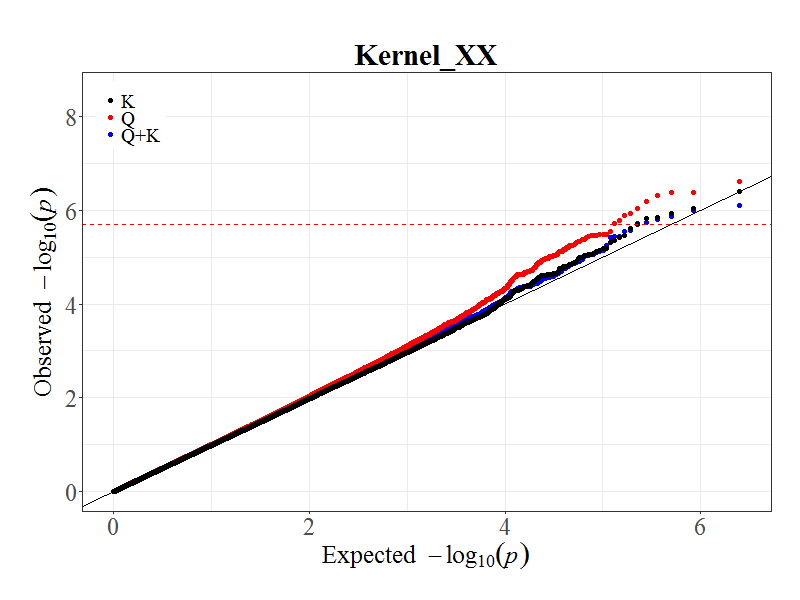

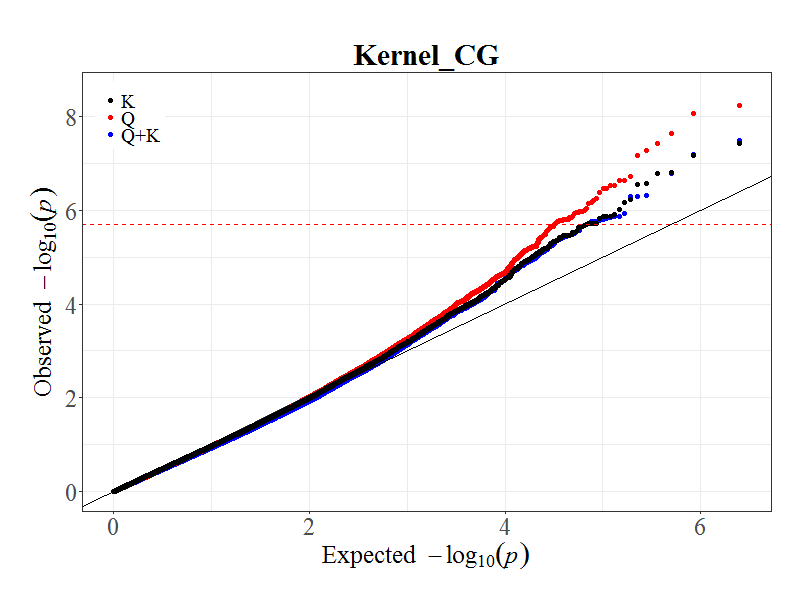

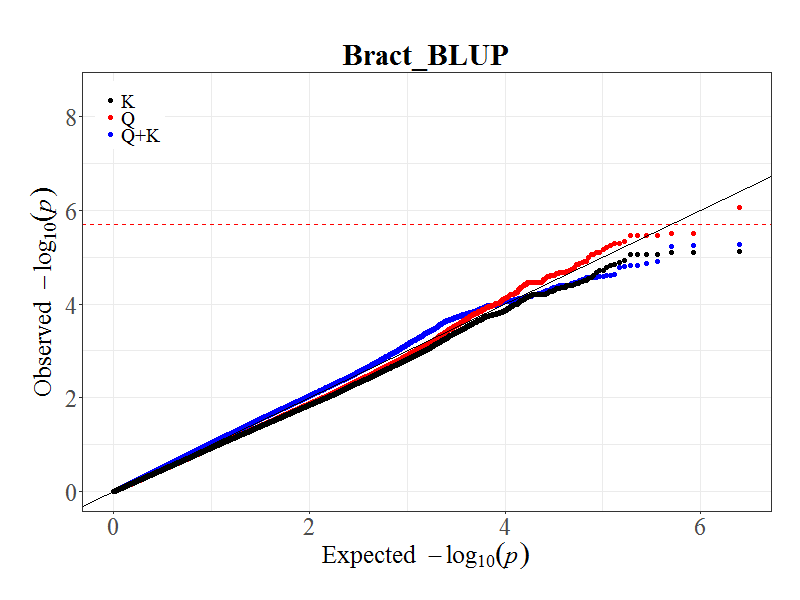

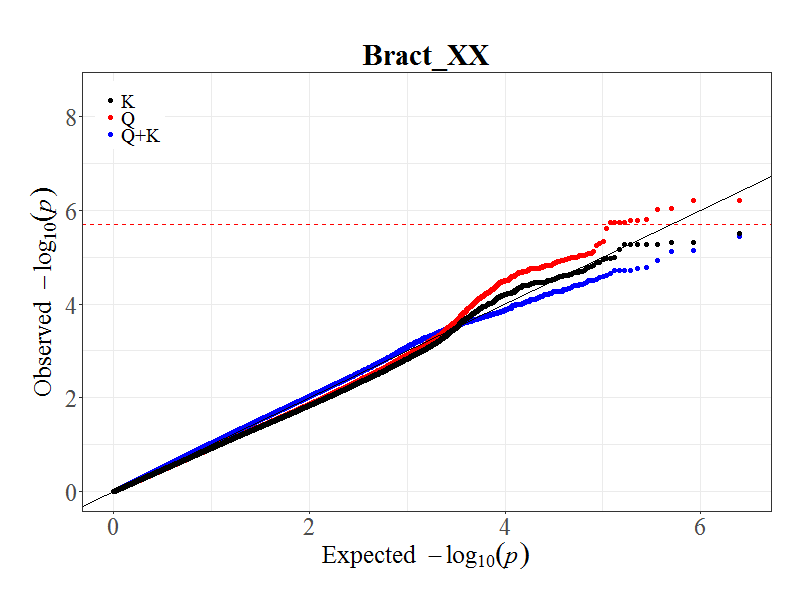

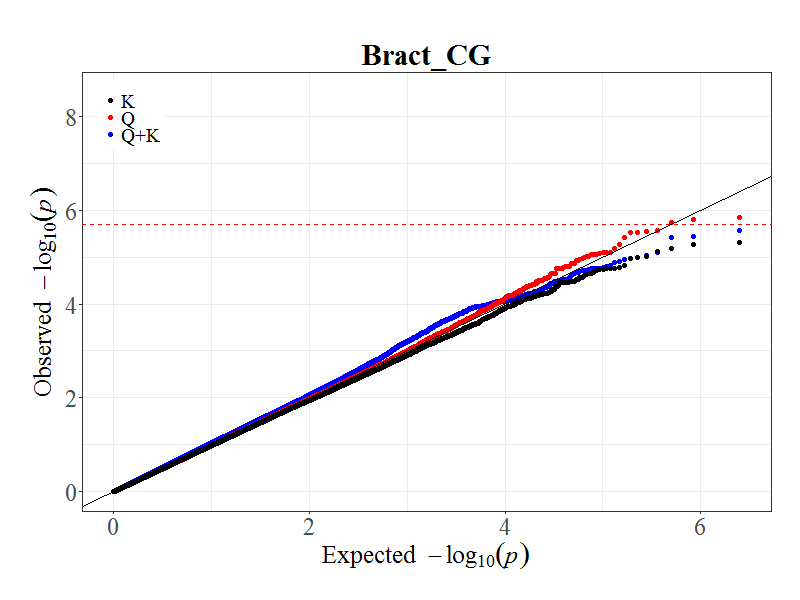

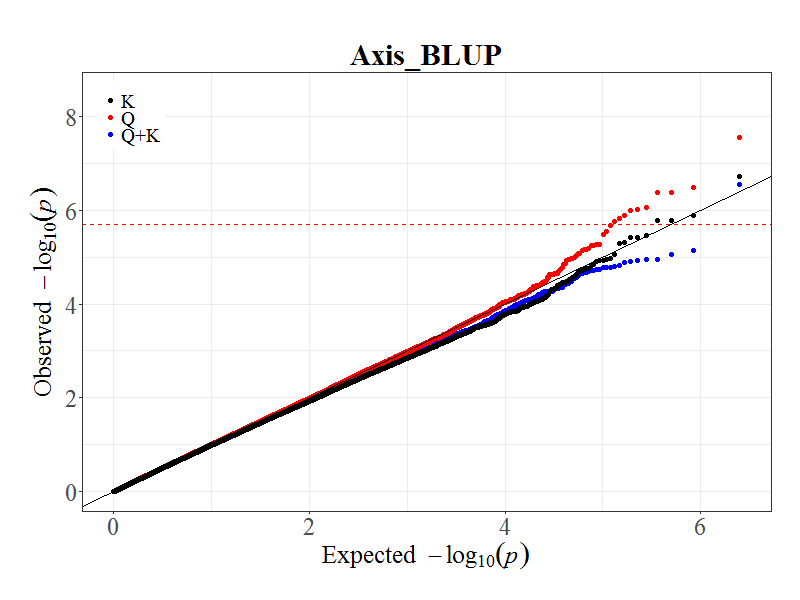

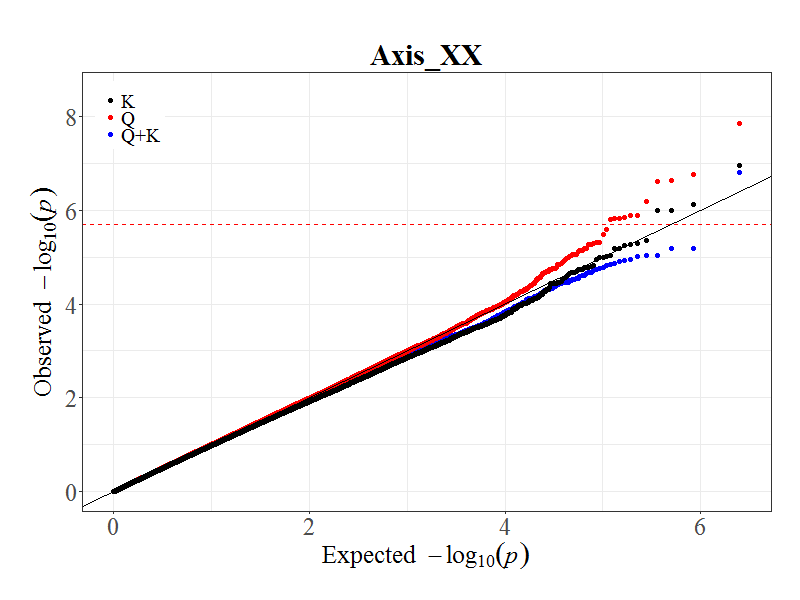

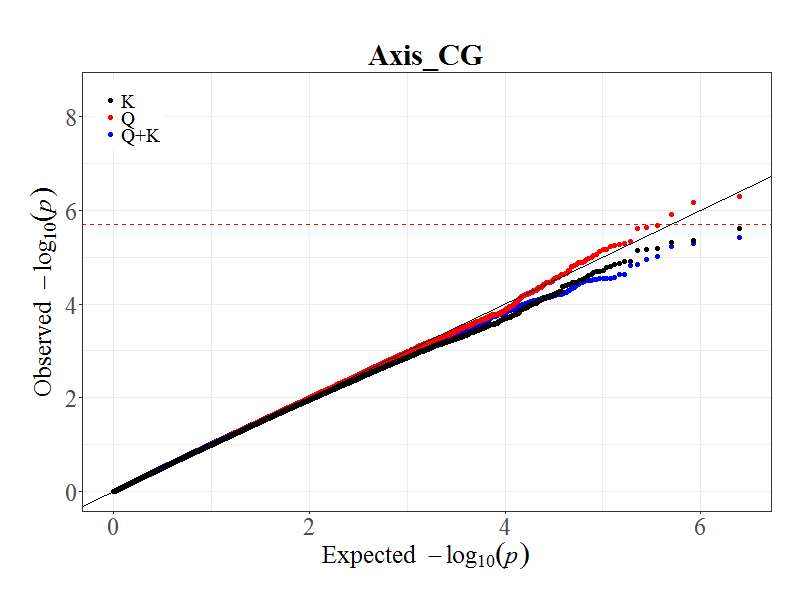


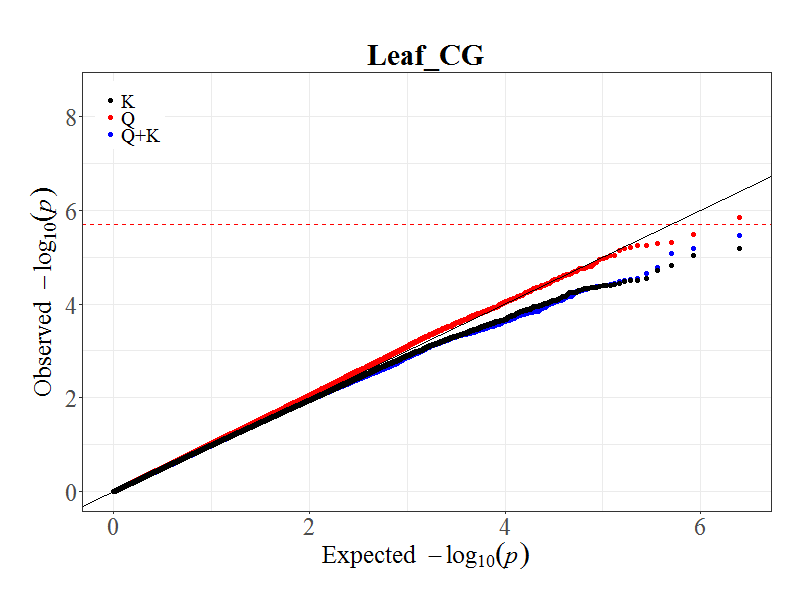


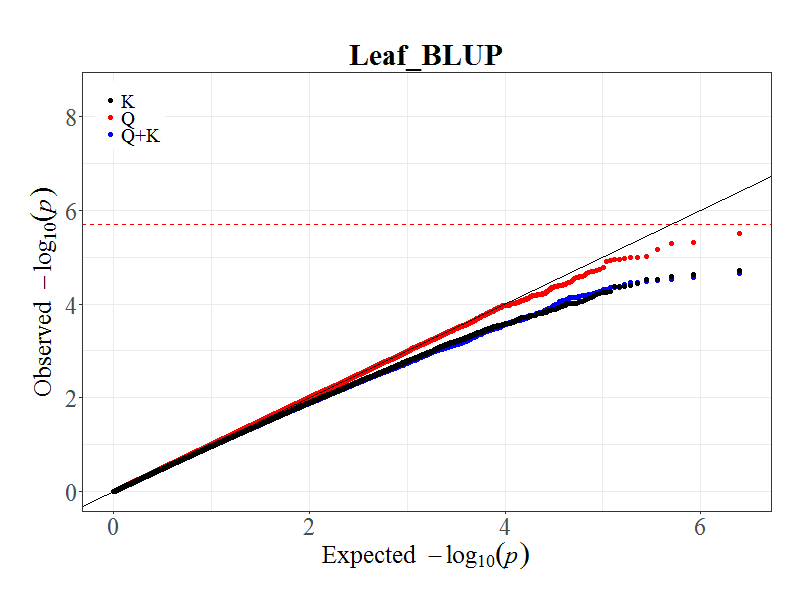

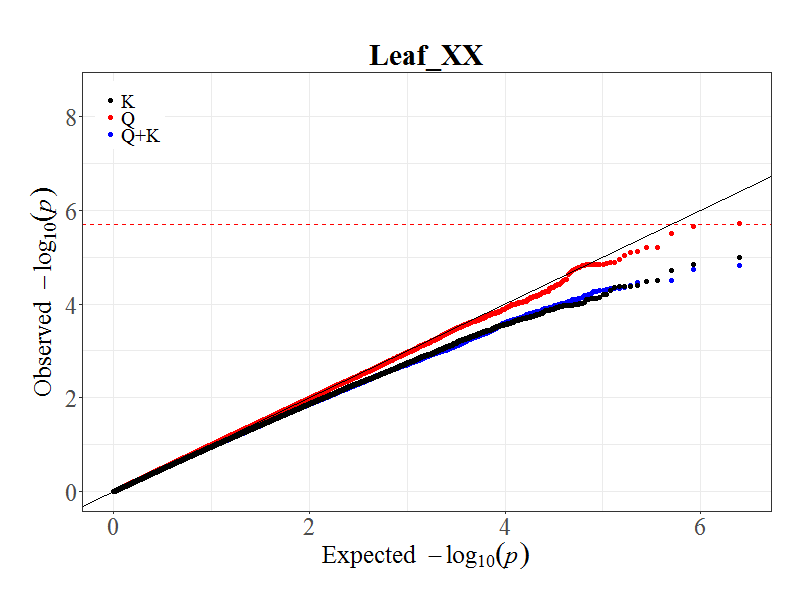


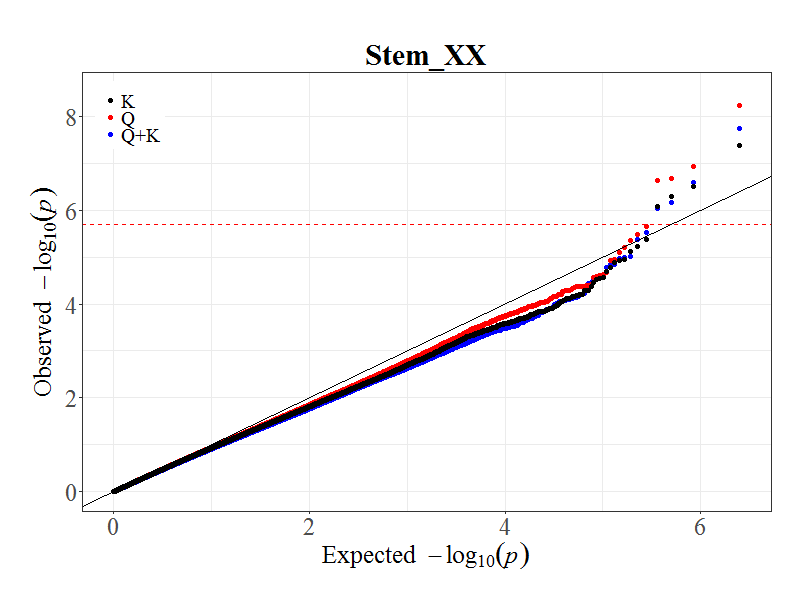

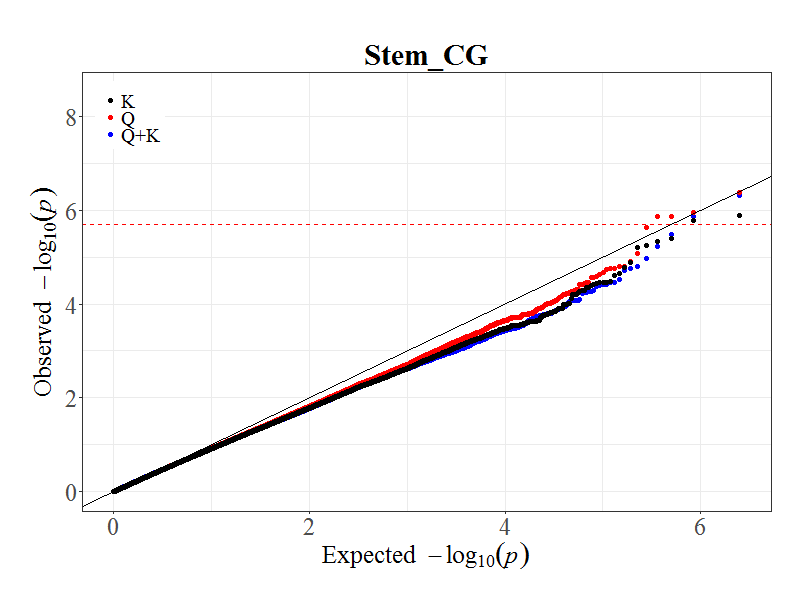


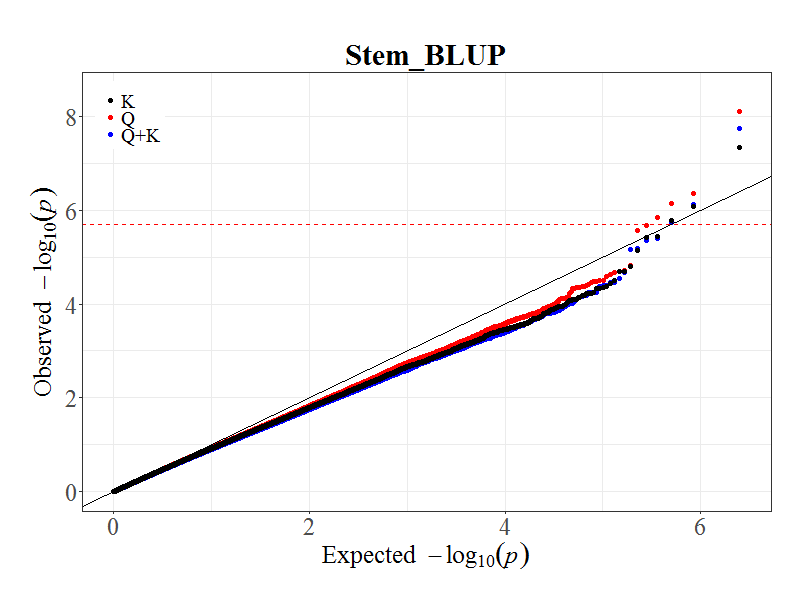


**Figure S3.** Comparison of quantile-quantile (QQ) plots resulting from GWAS, based on 1.25M SNPs, using three models (Q, K and Q+K) for mercury content in maize axis, stem, bract, leaf, and kernel at three environments.


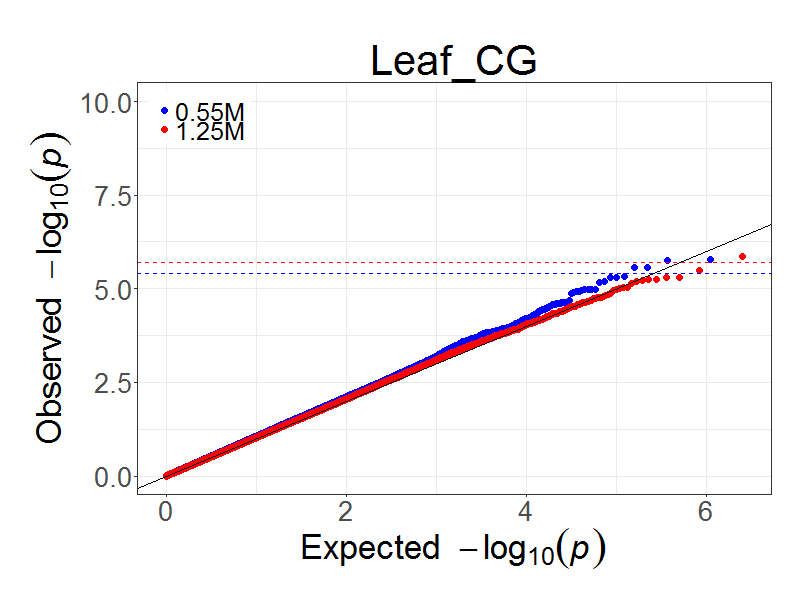

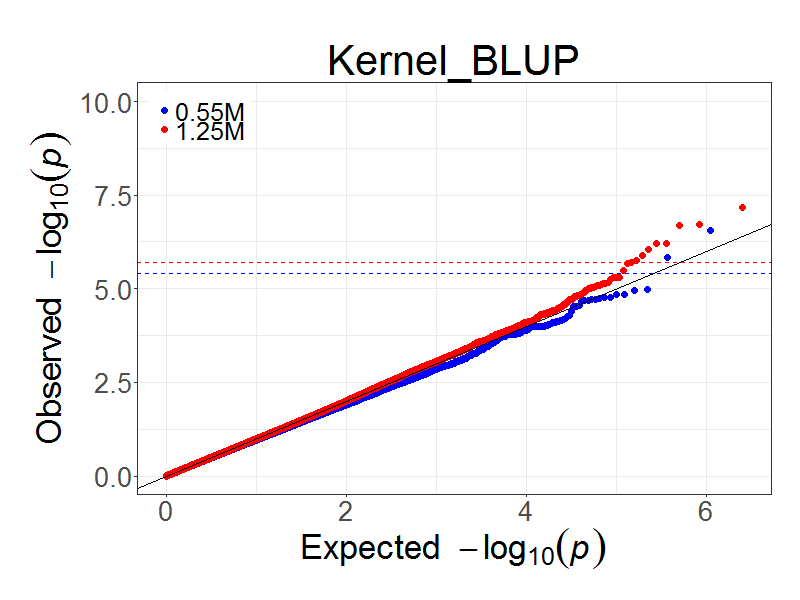

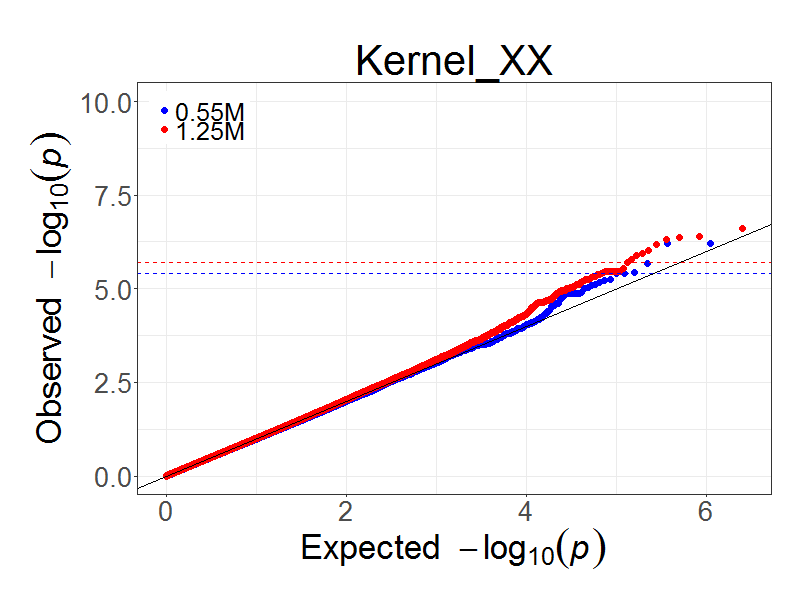

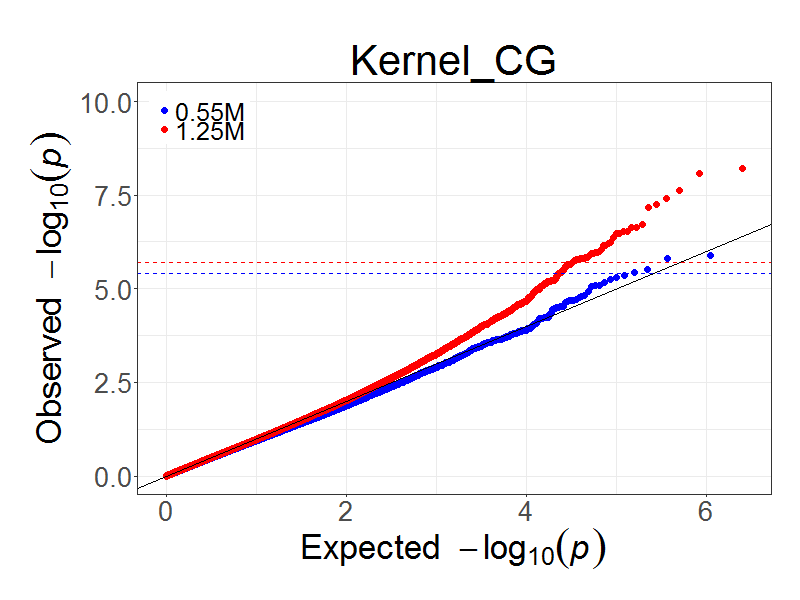

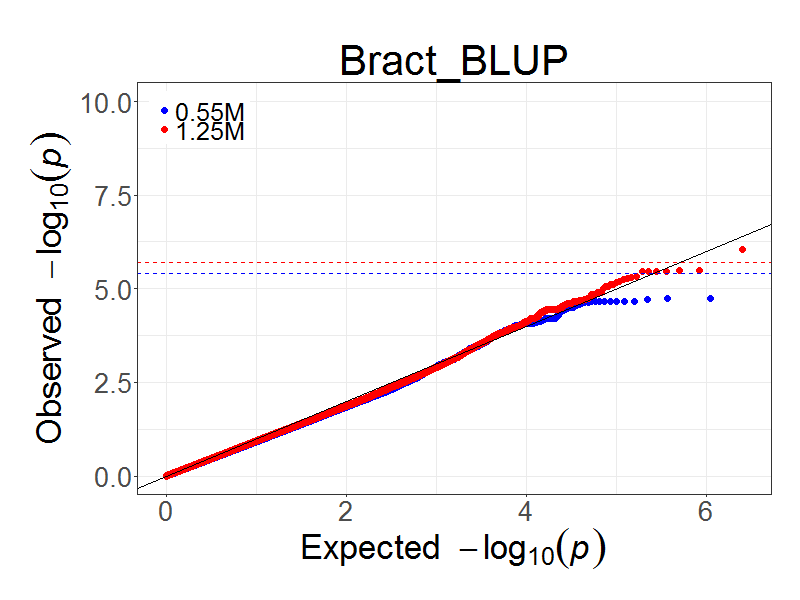

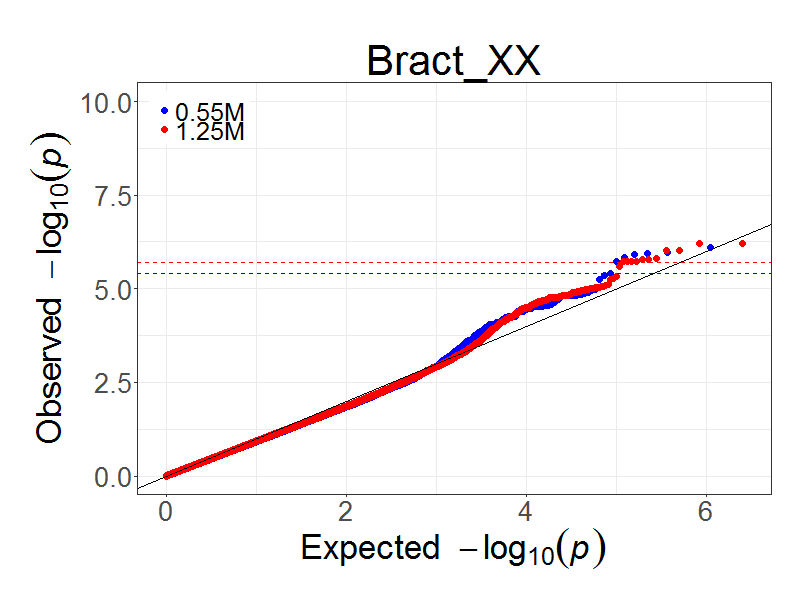

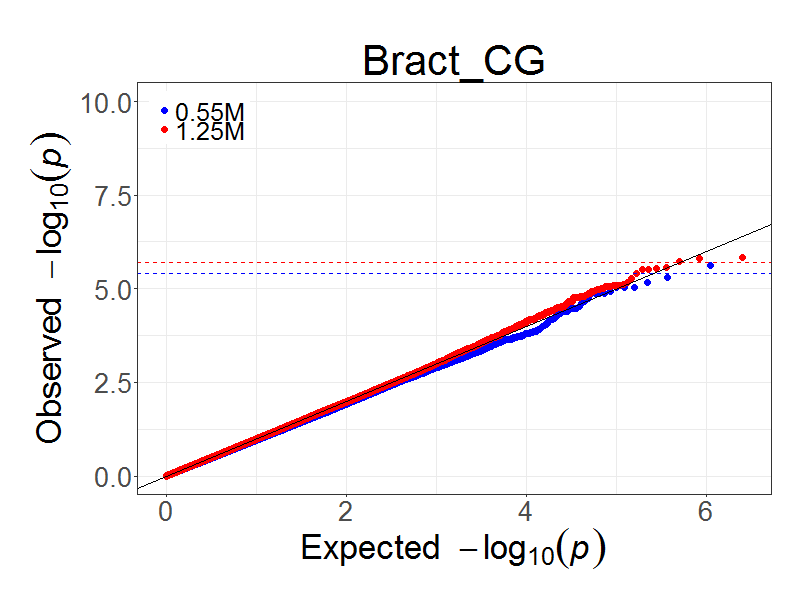

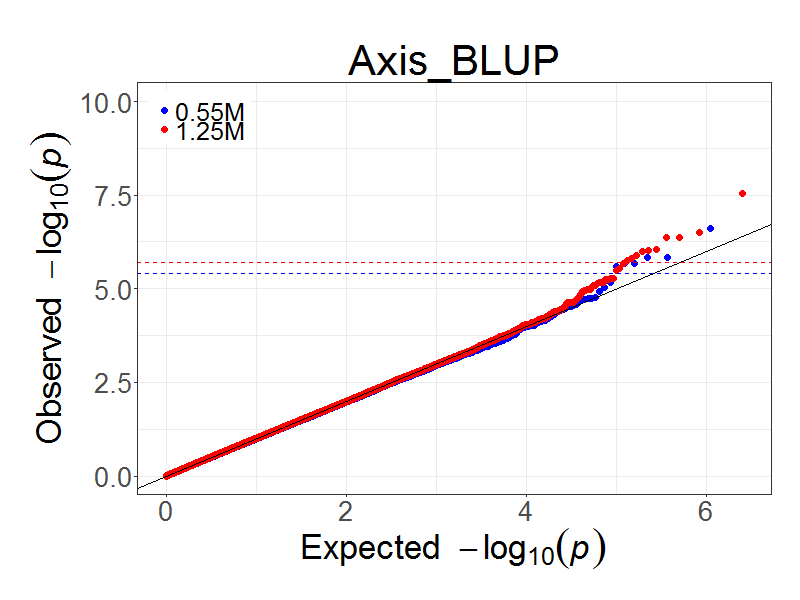

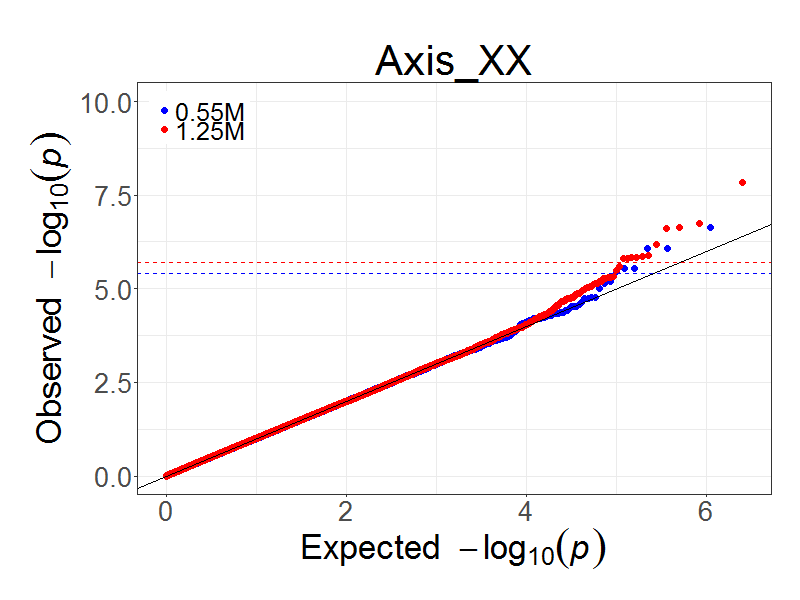

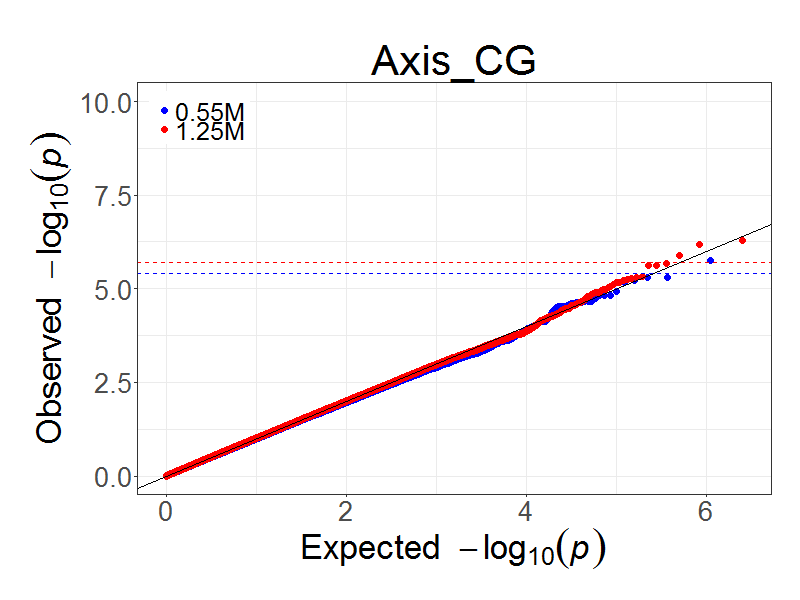


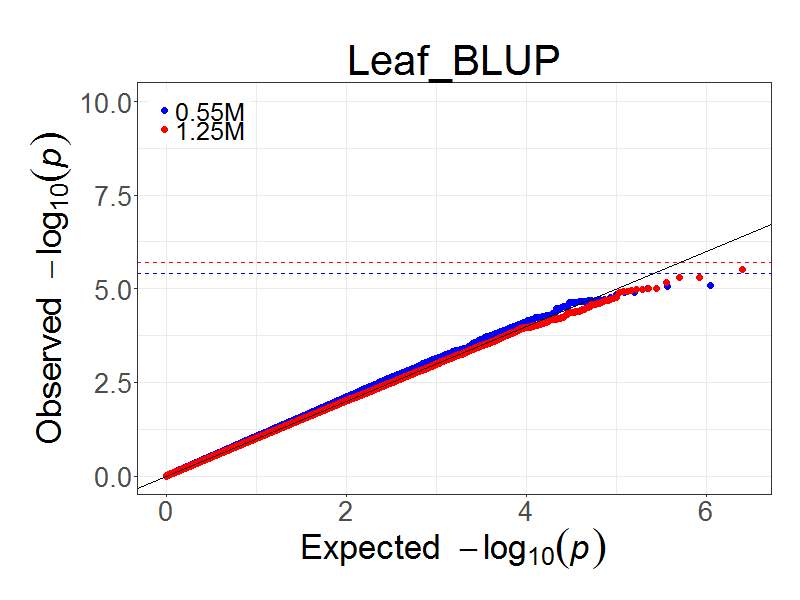

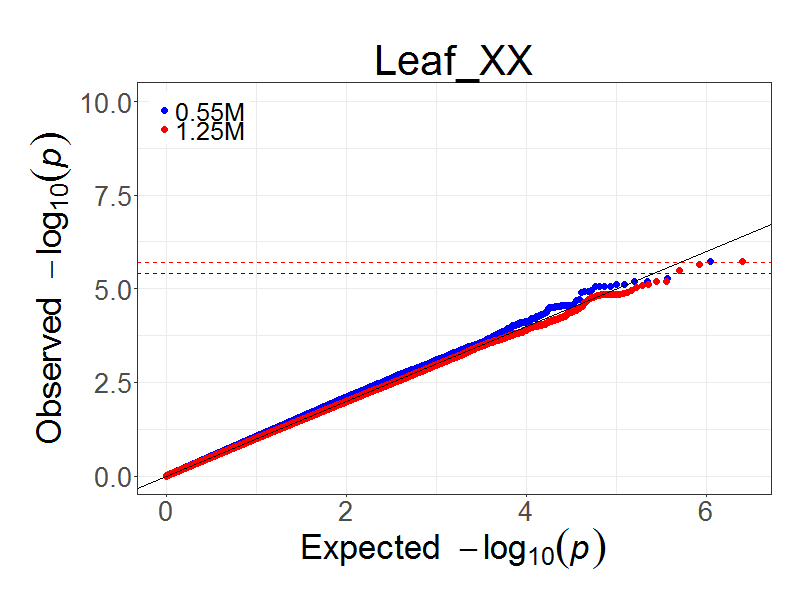


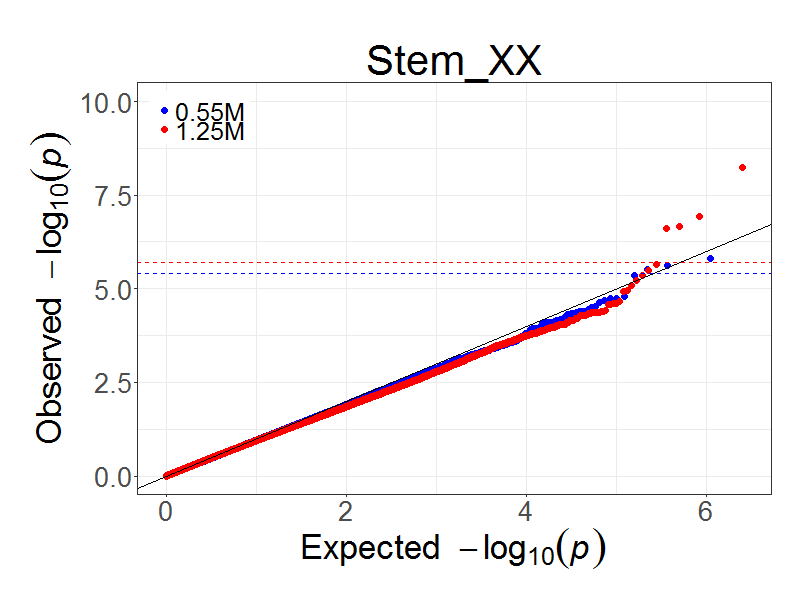

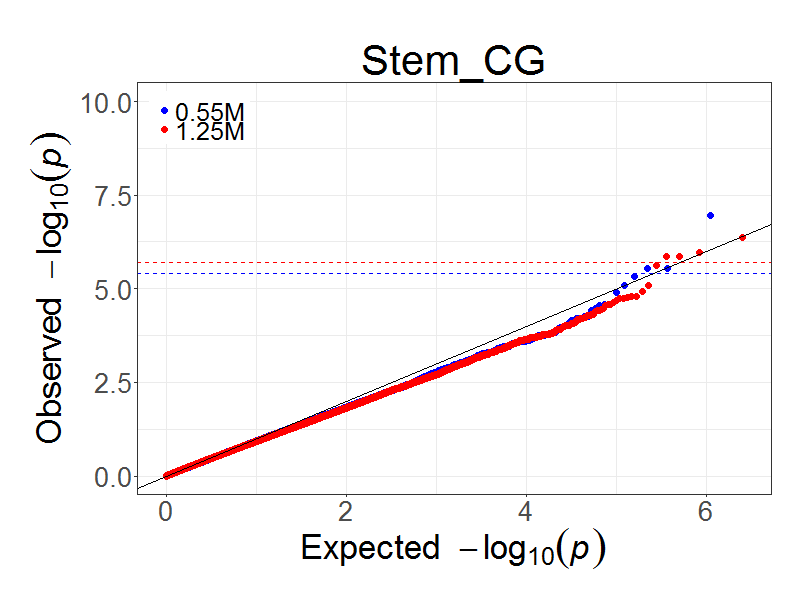


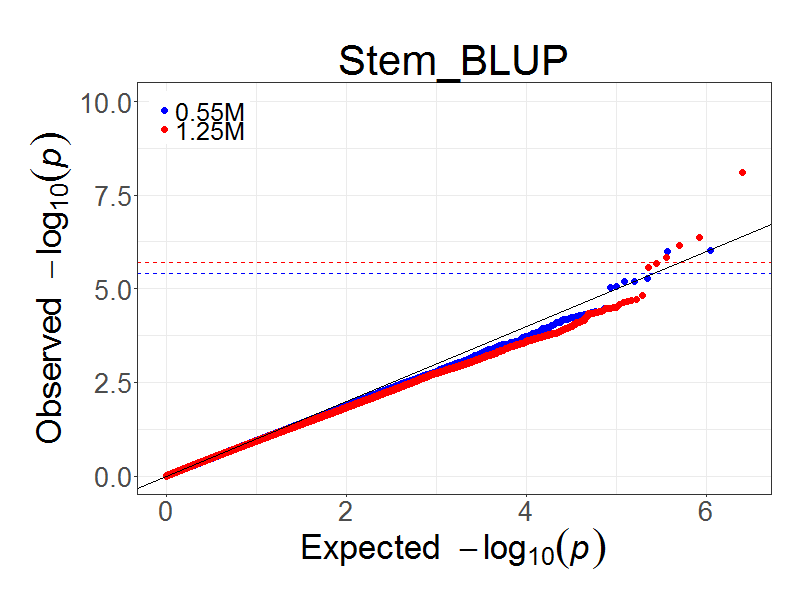


**Figure S4.** Comparison of Quantile-quantile (QQ) plots resulting from GWAS, based on 0.55M SNPs and 1.25M SNPs, using Q model for mercury content in maize axis, stem, bract, leaf, and kernel at three environments.


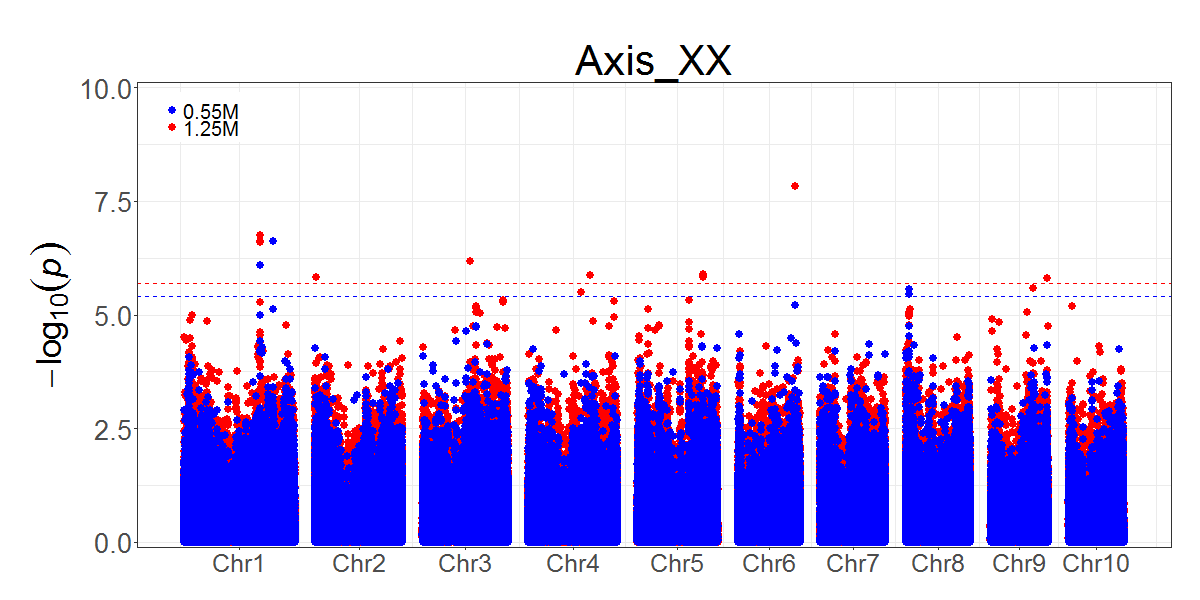

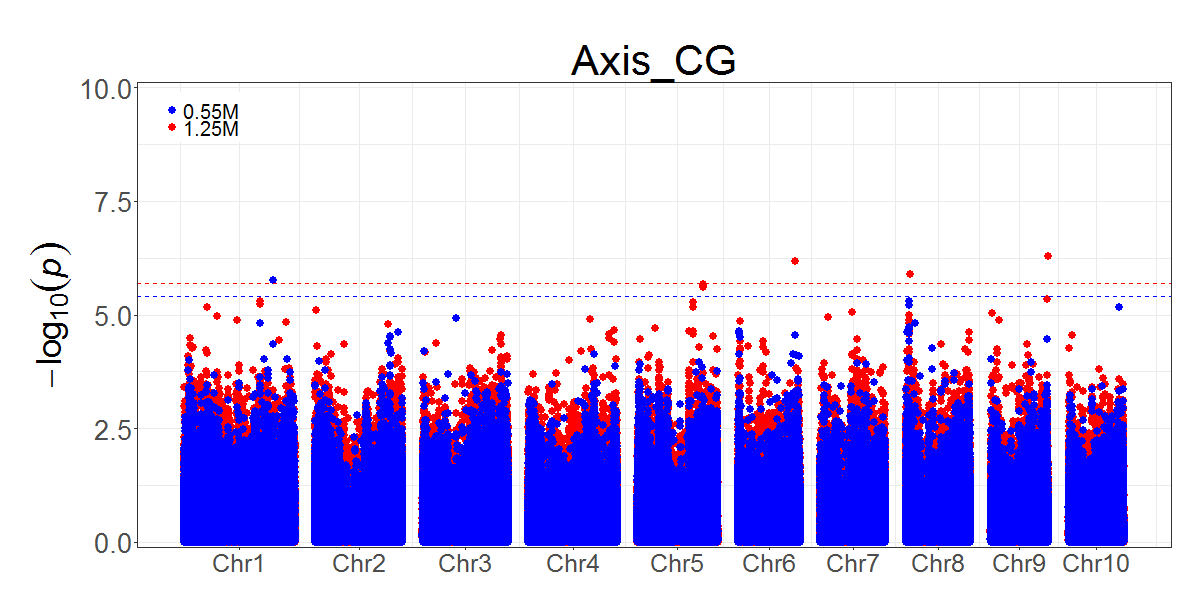


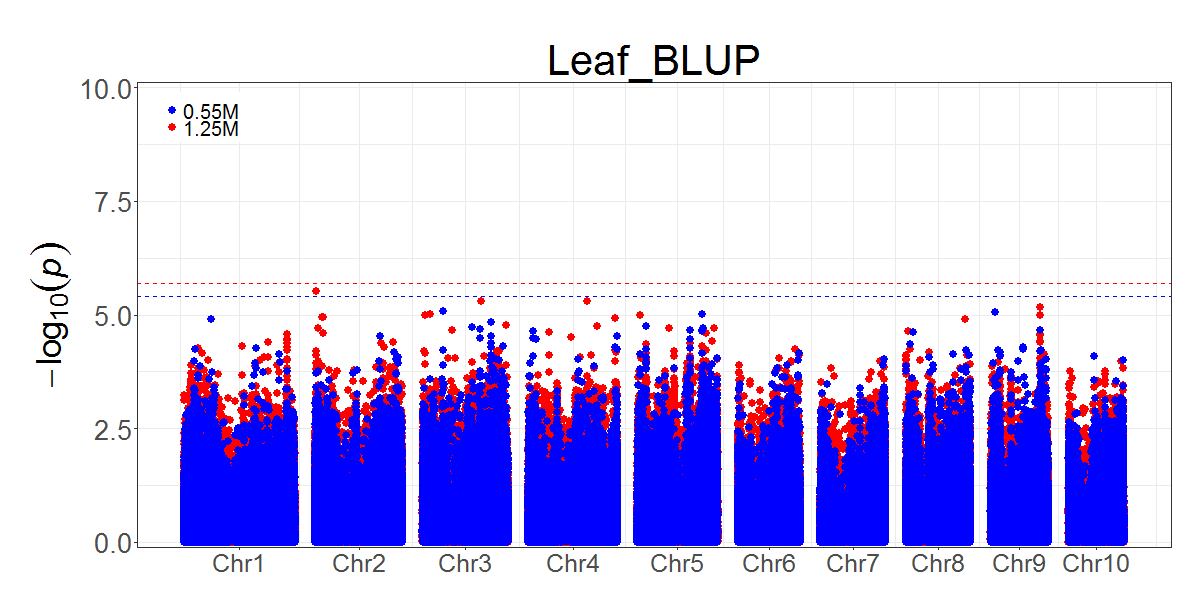

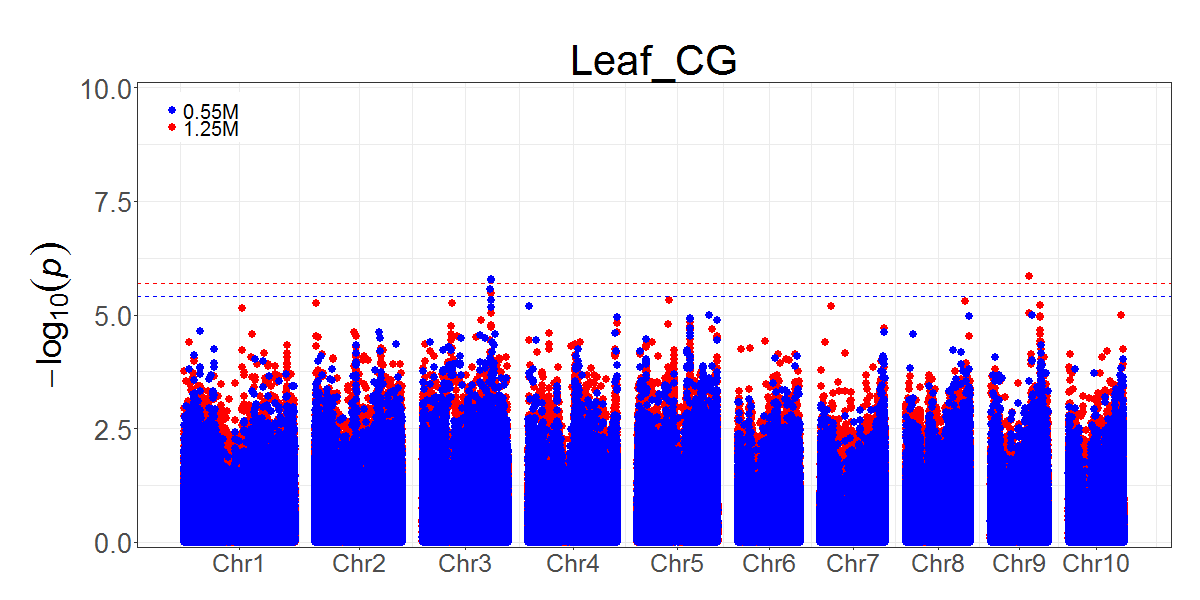

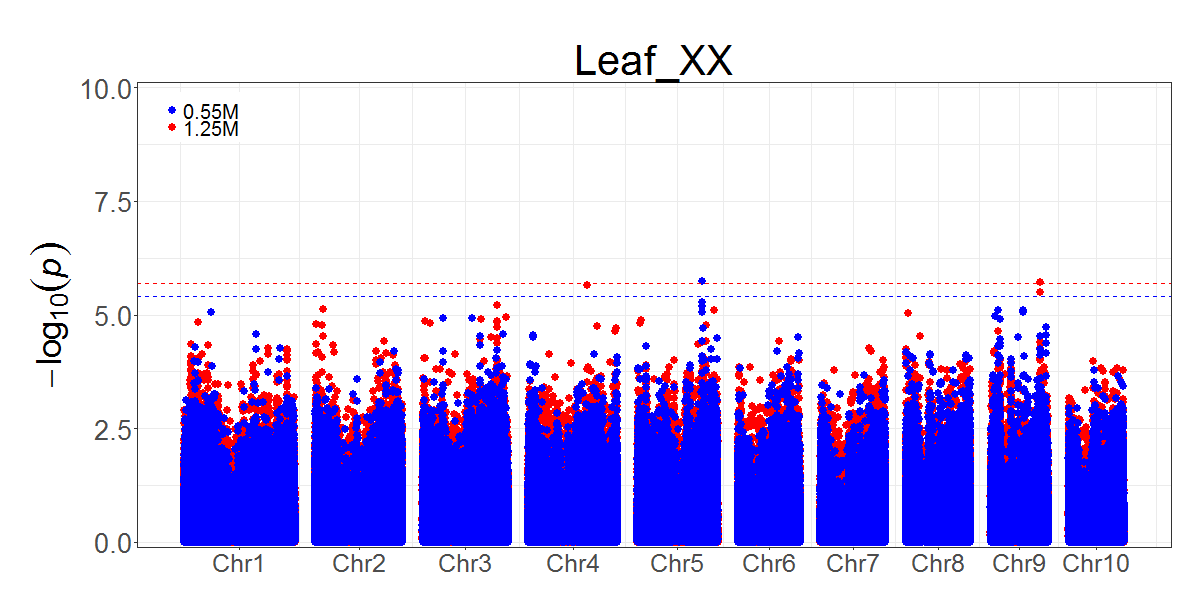

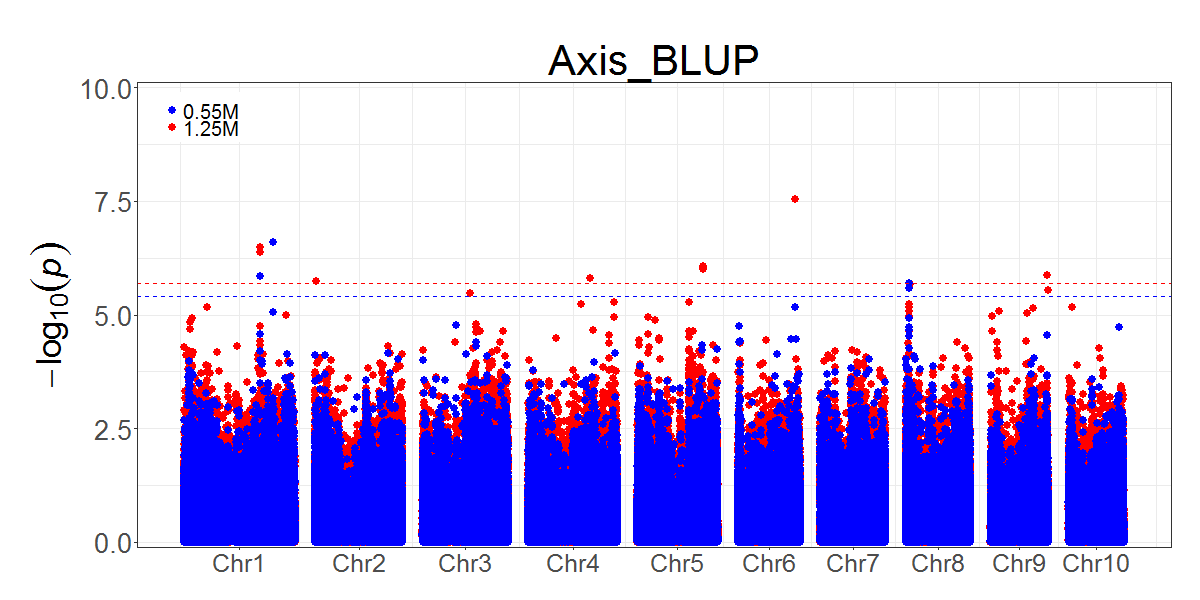

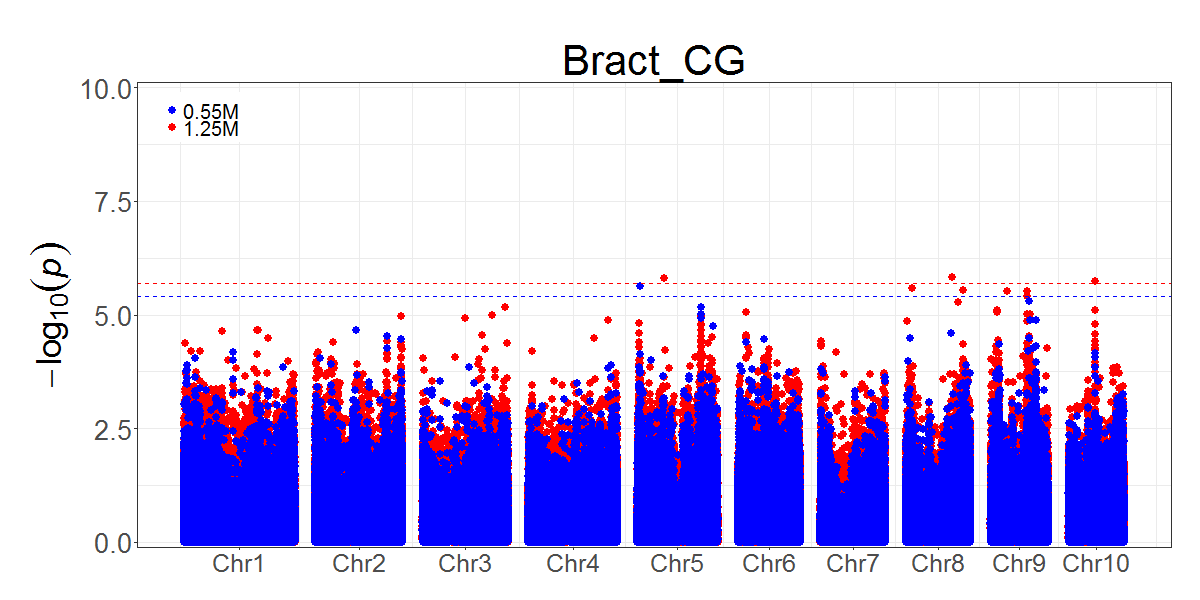

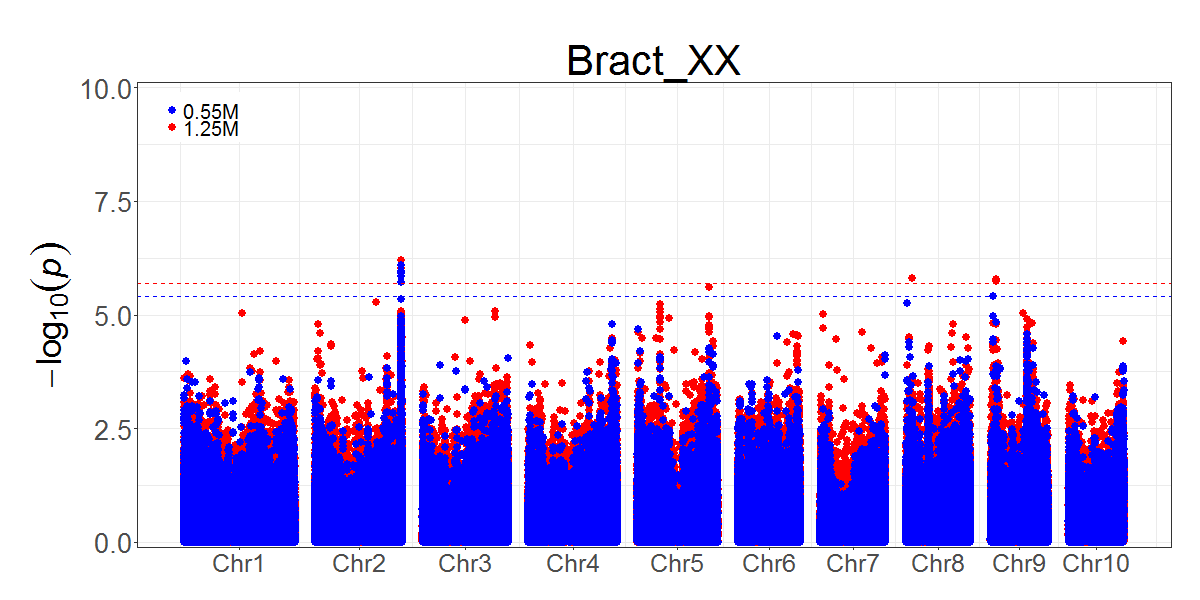

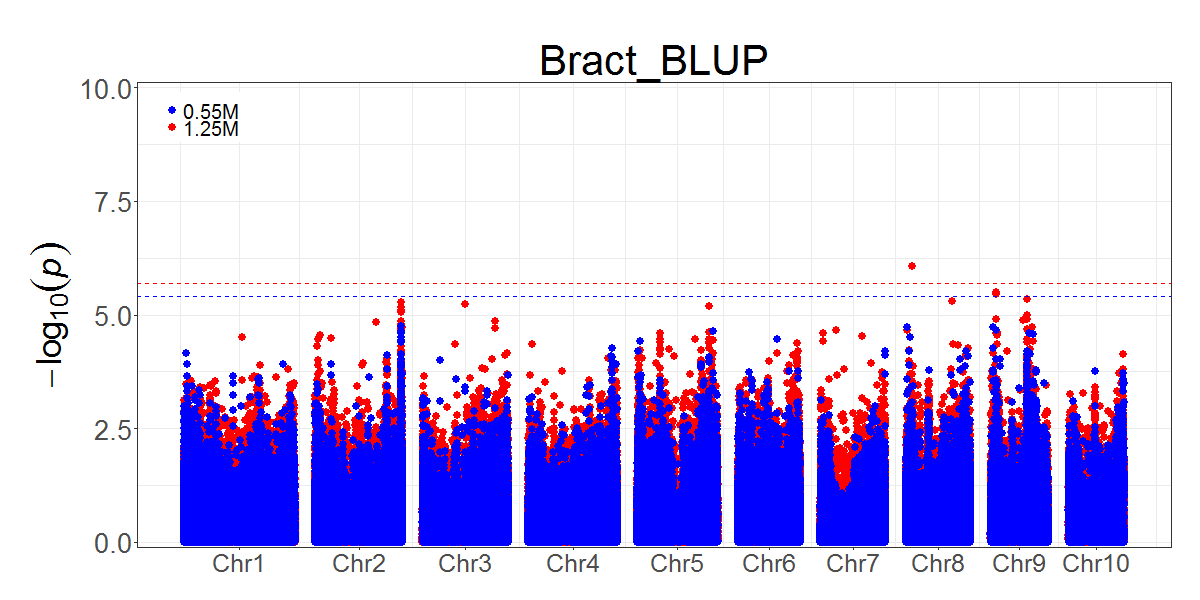

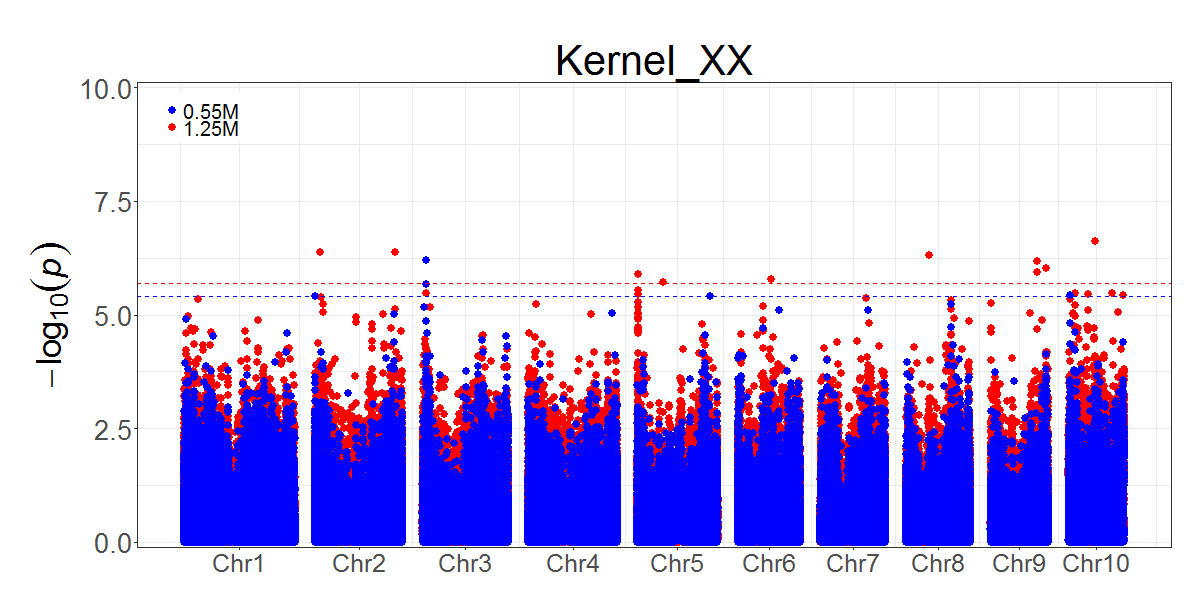

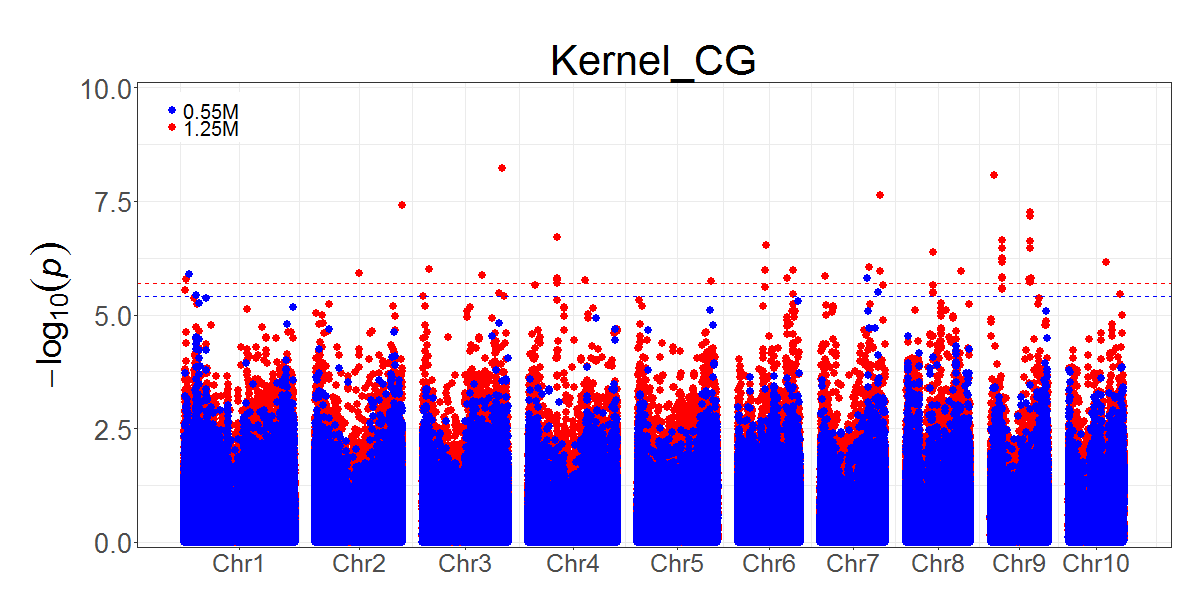

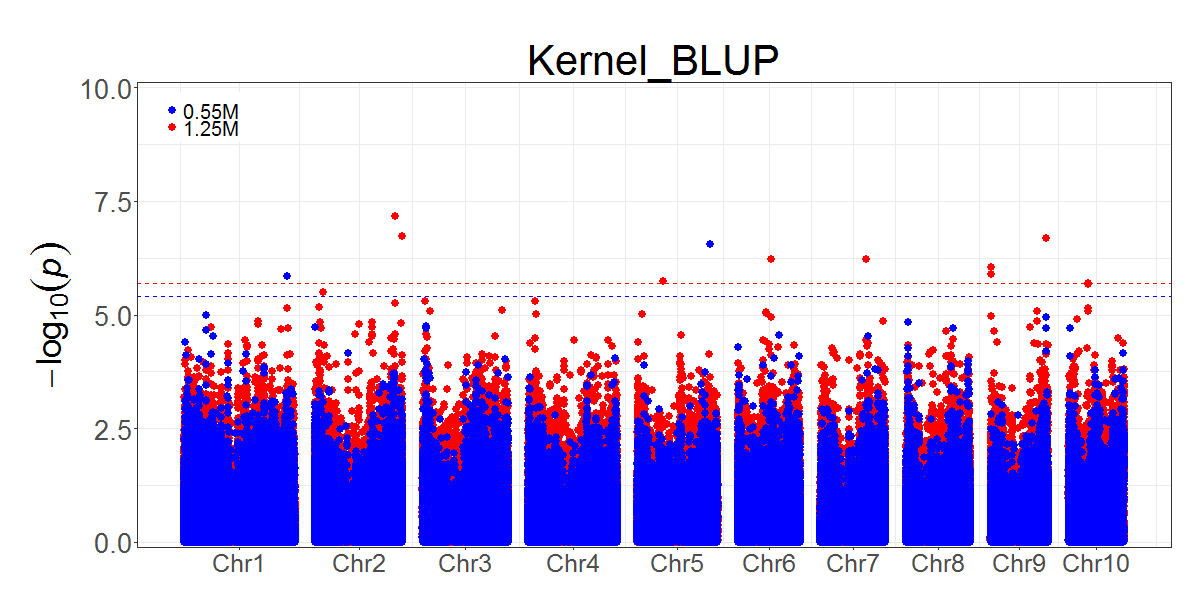


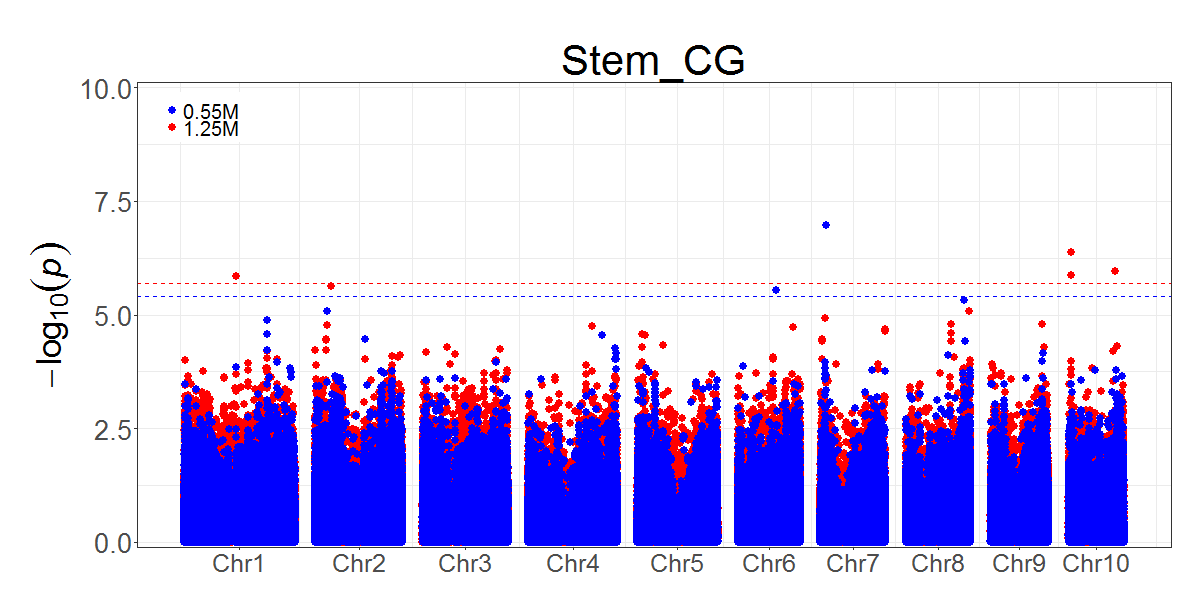

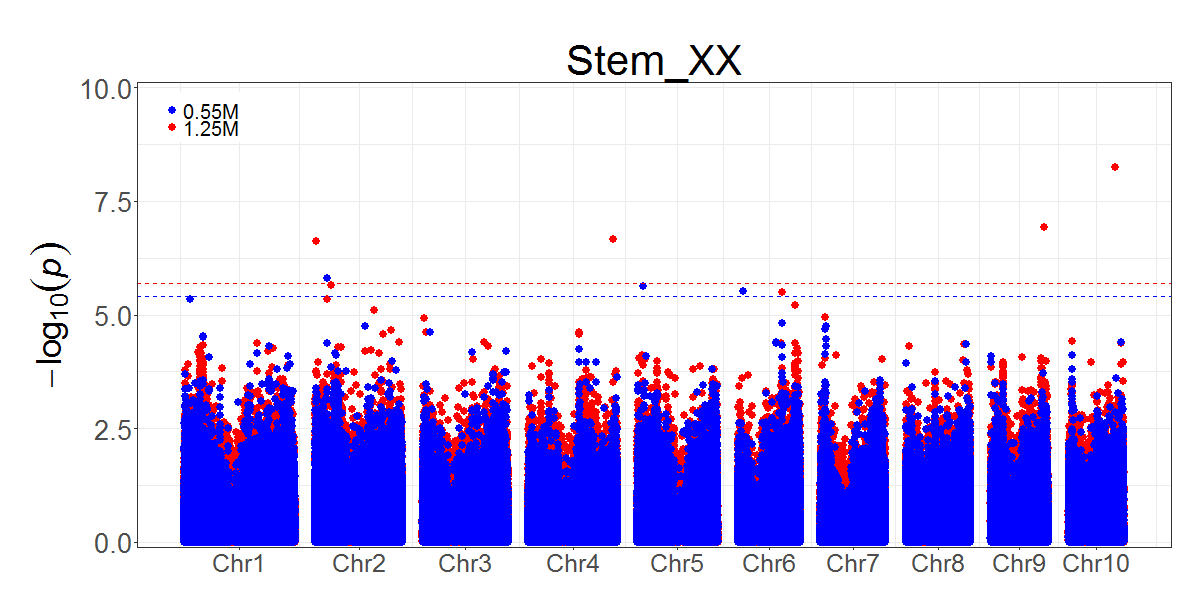

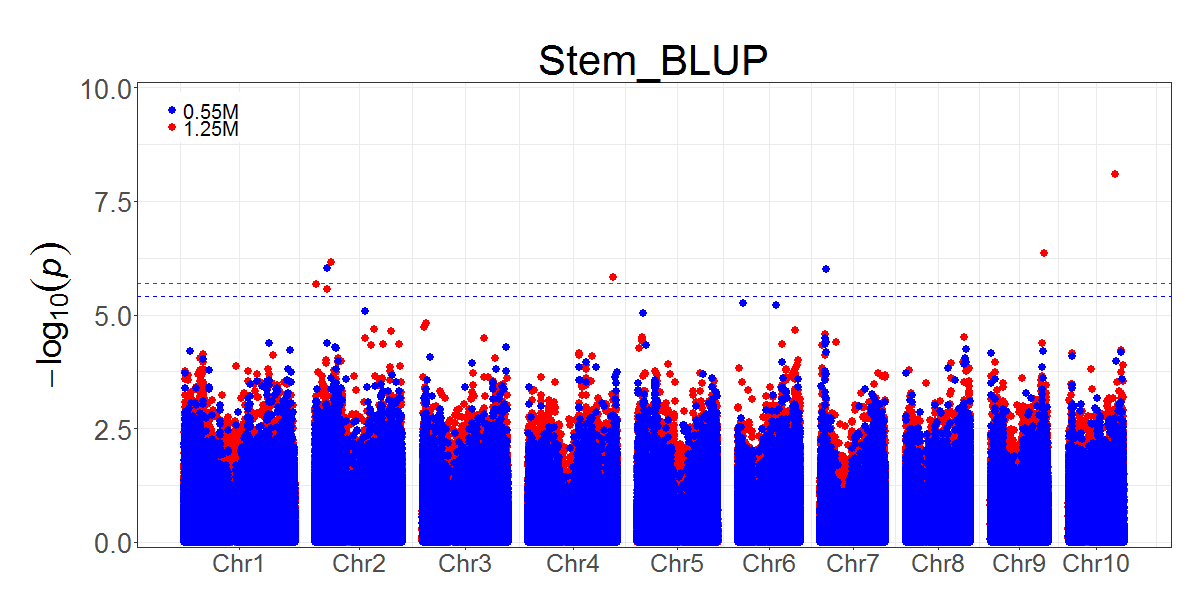


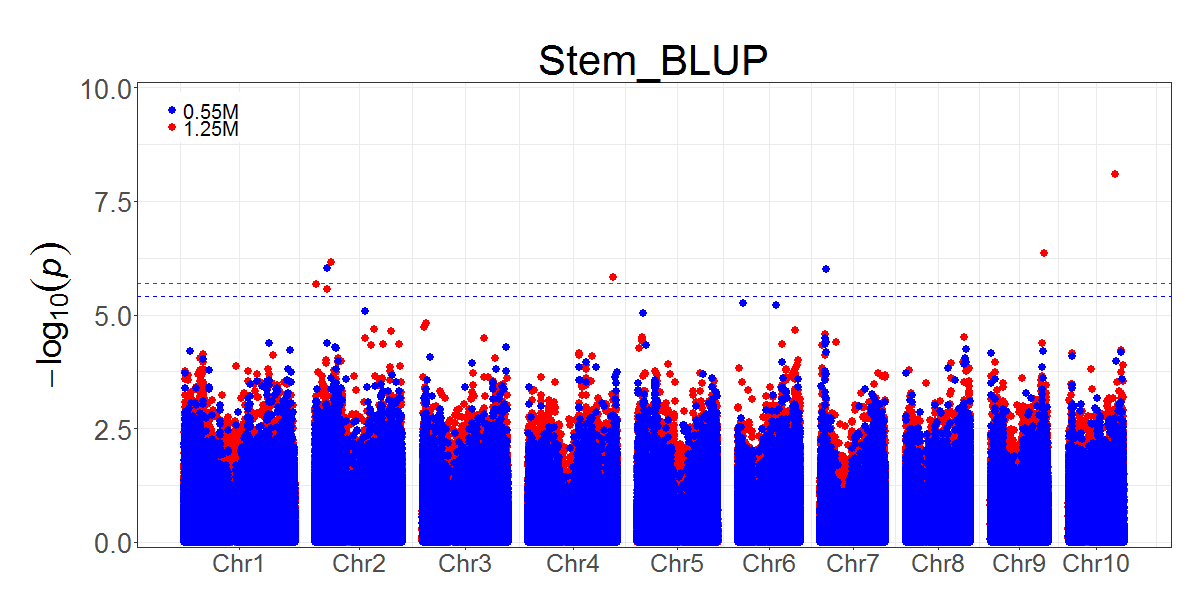


**Figure S5**. Comparison of Manhattan plots resulting from GWAS, based on 0.55M SNPs and 1.25M SNPs, using Q model for mercury content in maize axis, stem, bract, leaf, and kernel at three environments.
